# Supplementary material for: Comparative plastomes of Carya species provide new insights into the plastomes evolution and maternal phylogeny of the genus
Source: PubMed Central journal article supplement (PMC9667483; doi:10.3389/fpls.2022.990064), 2022-10-13
Supplement: DataSheet_1.pdf [file DataSheet_1.pdf]

**Supplementary Figures and Tables**  
**Supplementary Figures and Legends**

**Supplementary Figure 1.** Sampled tree and the habitats of *C. poilanei*.

(A)

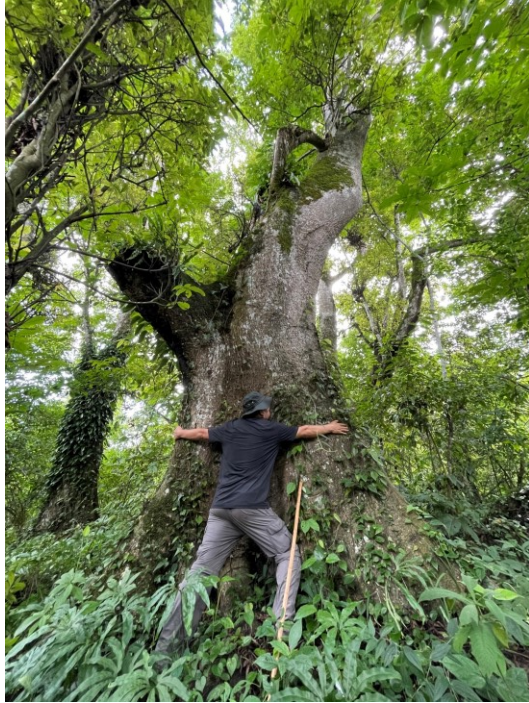

(B)

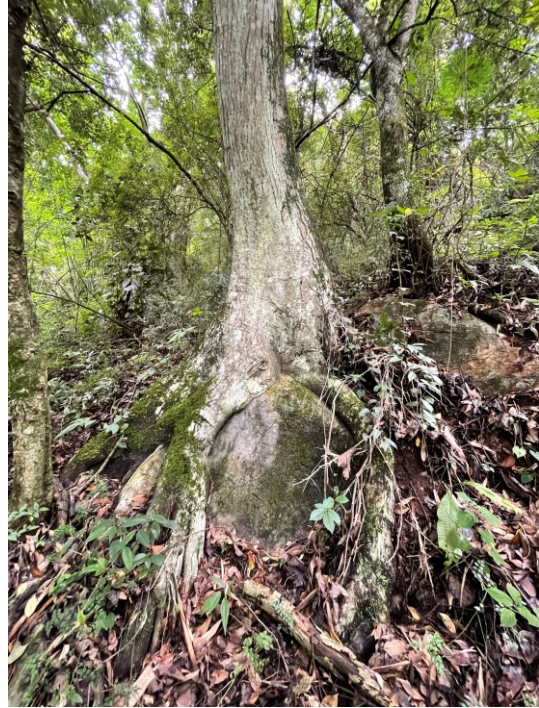

(C)

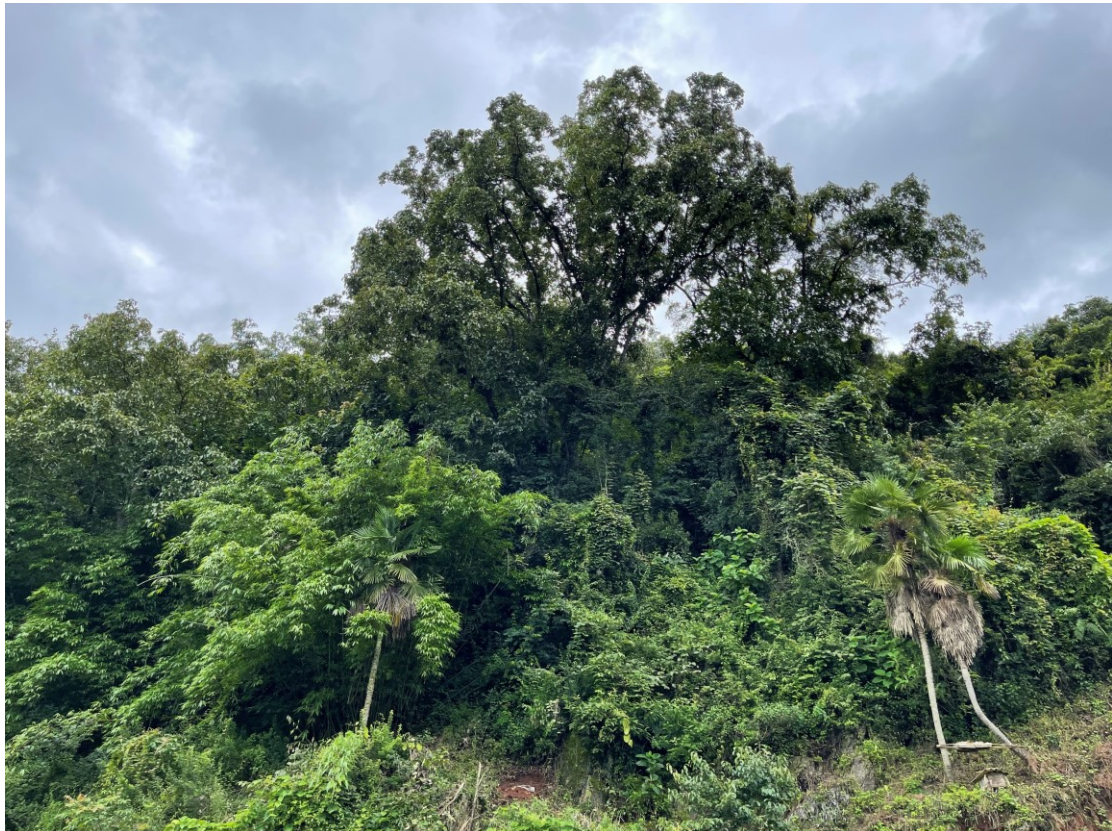



Continued.

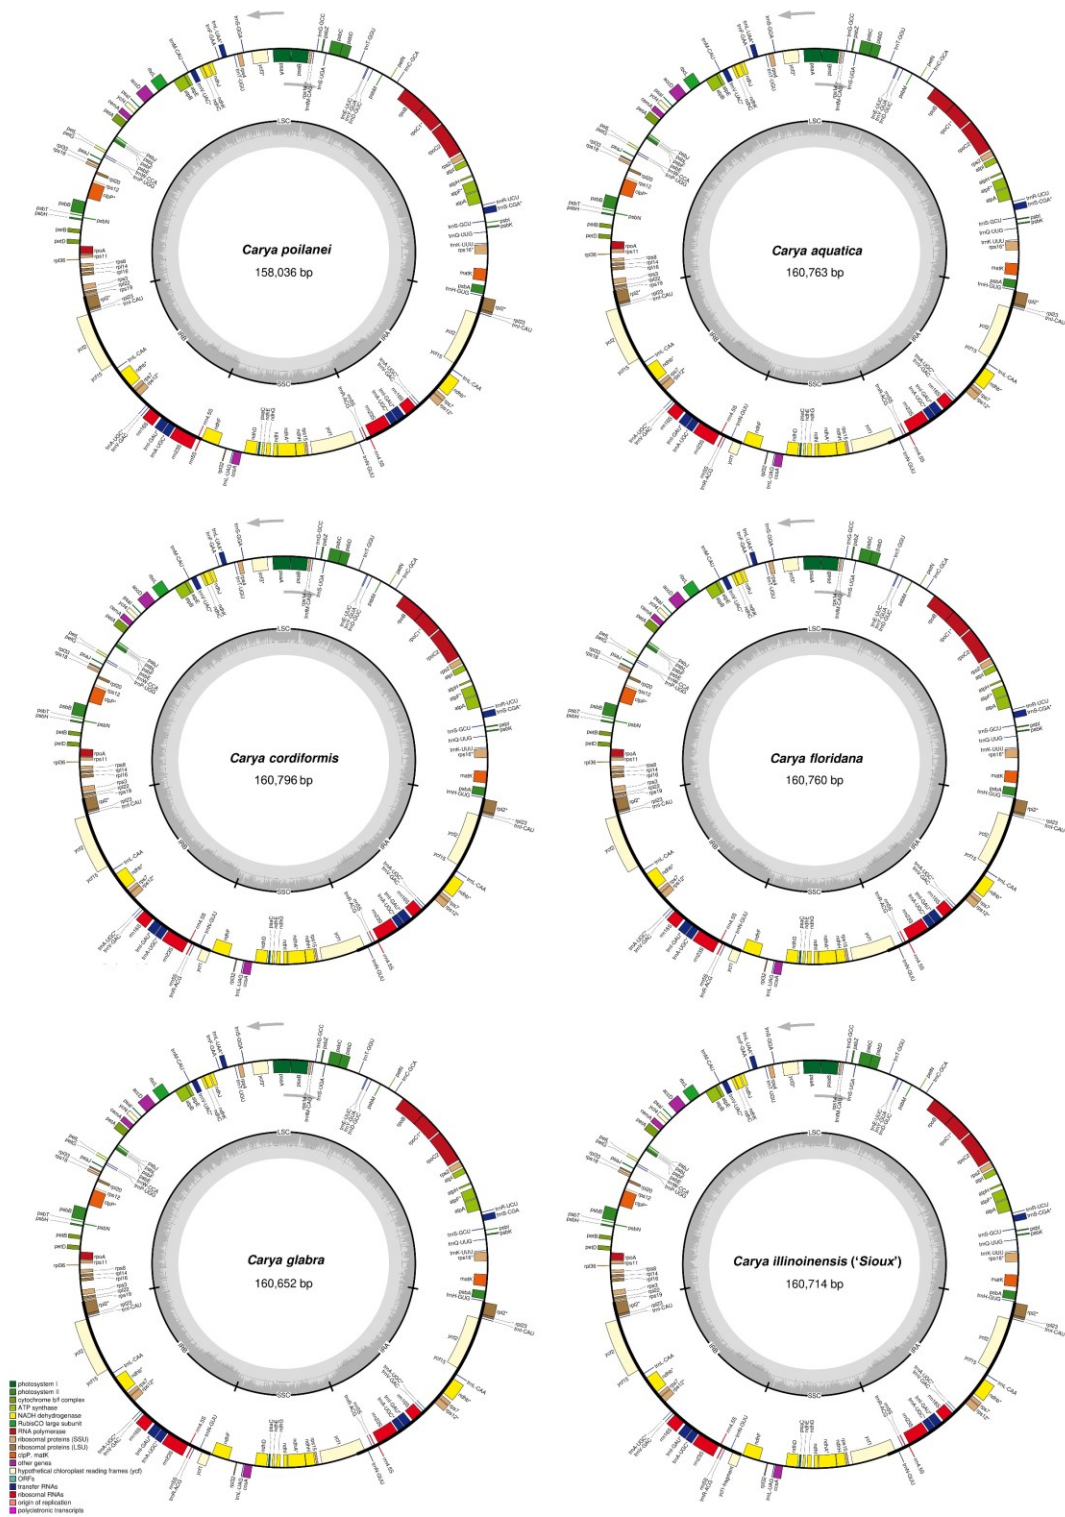

Continued.

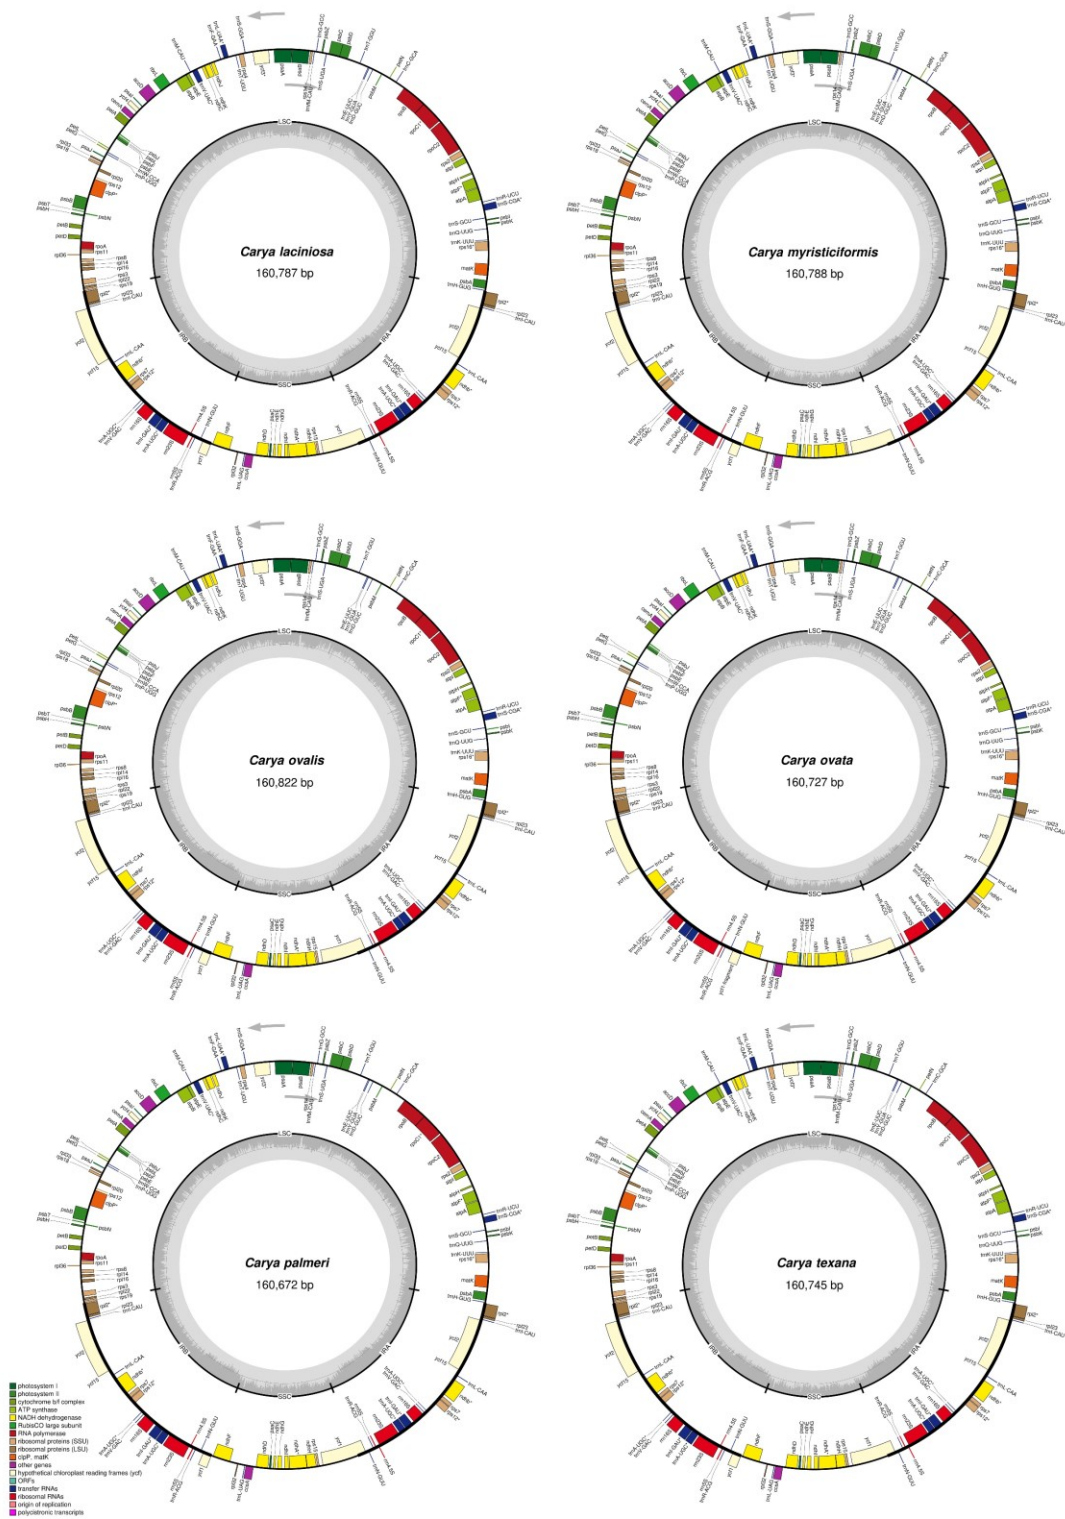

Continued.

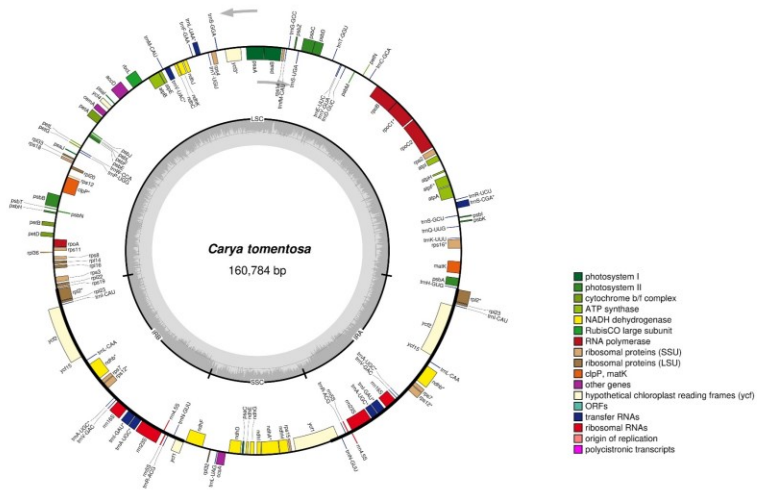



**Supplementary Figure 4.** Statistics of SSR types. A, SSR types and their proportions in *Carya* plastomes. B, The detailed statistics of SSR types in *Carya* plastomes.

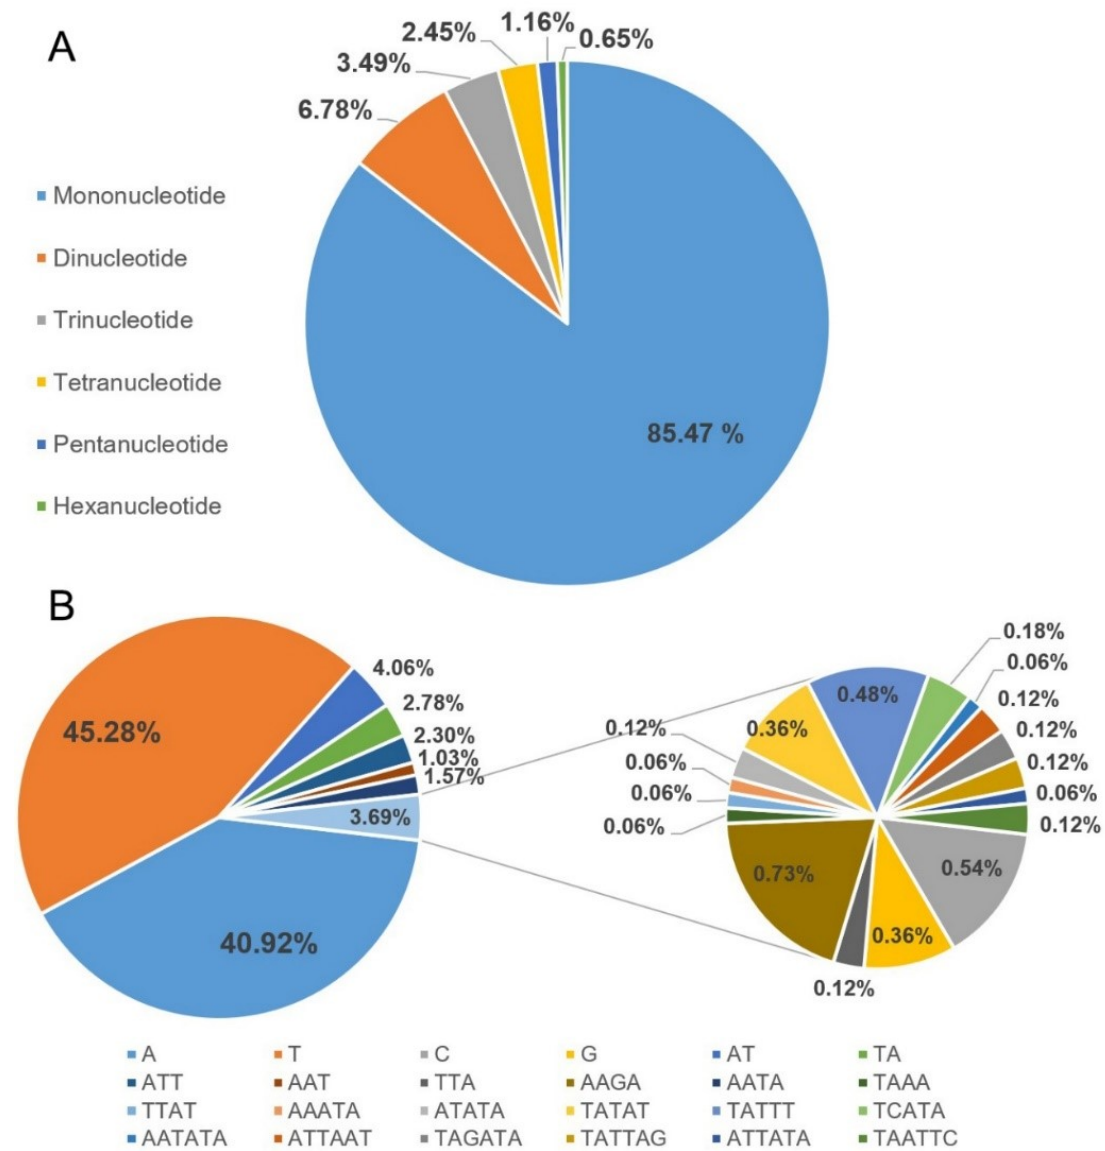

Supplementary Figure 5. Proportion of amino acids in *Carya* plastomes.

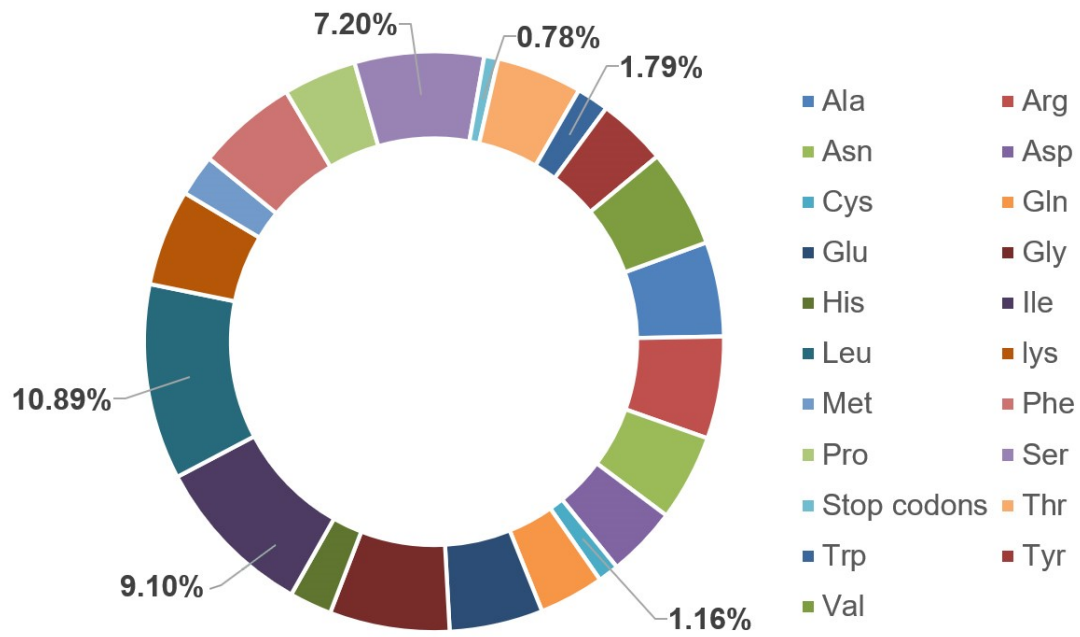



Supplementary Figure 6. Codon number (A) and usage statistics (B) of *Carya* plastomes.

(A)

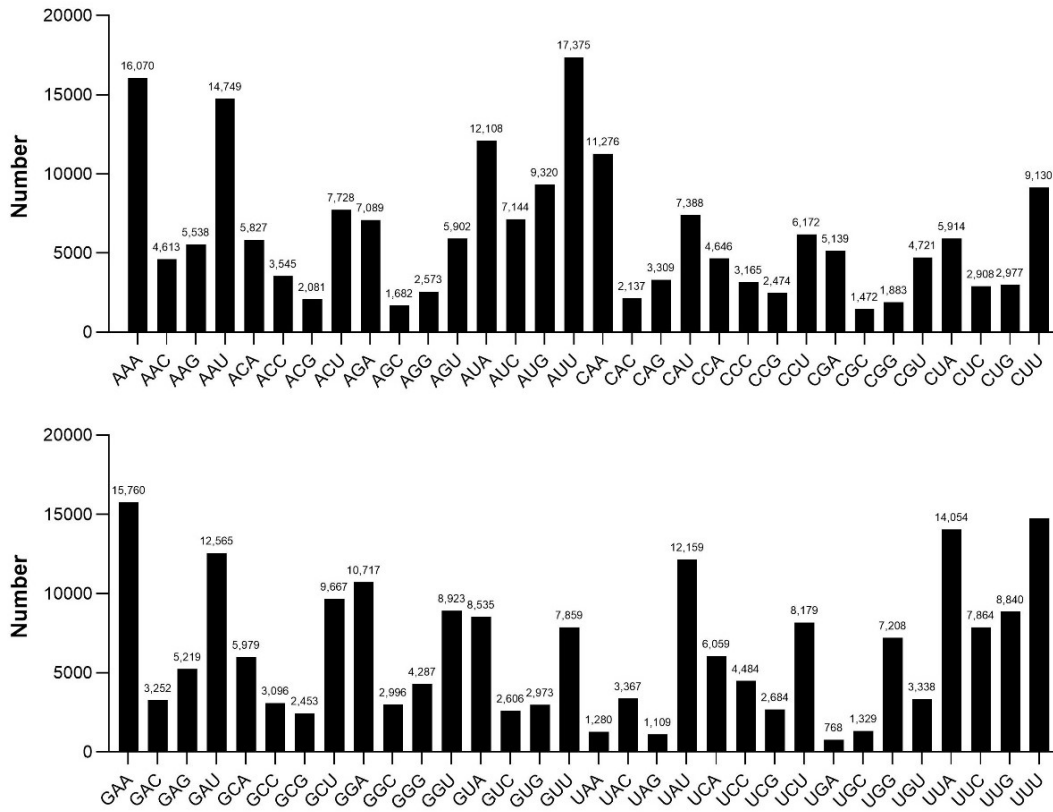

(B)

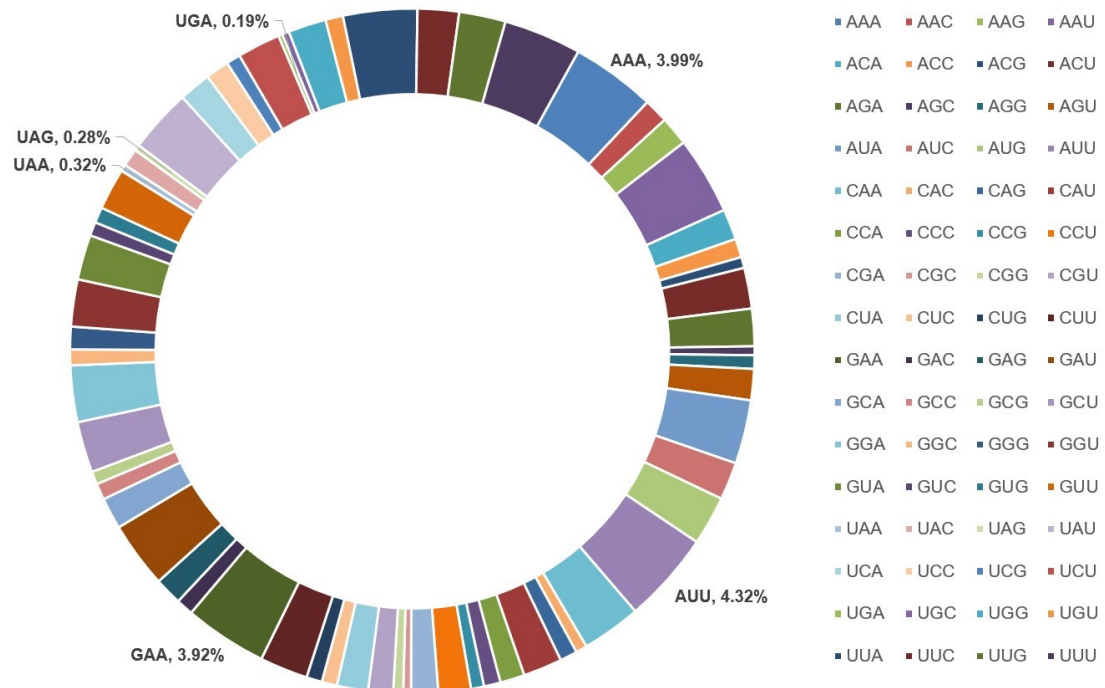

Supplementary Figure 7. Codon RSCU value of *Carya* plastomes.

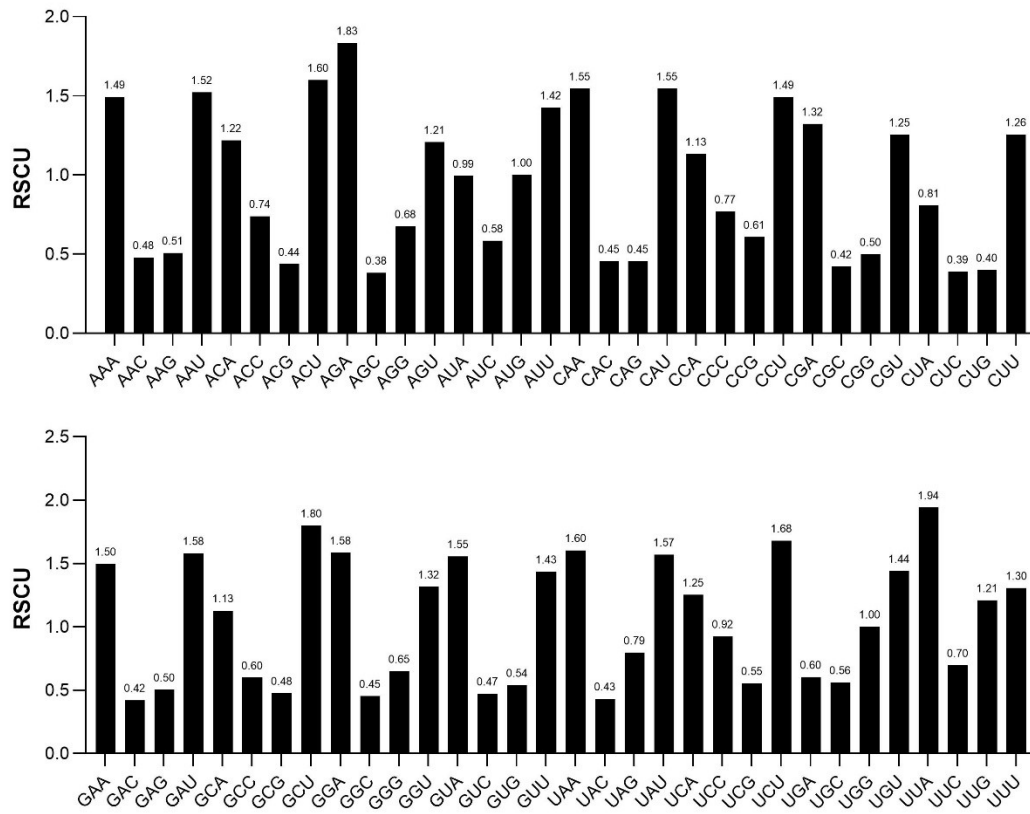

**Supplementary Figure 8.** RNA editing sites in the protein-coding genes of *Carya* plastomes. The genes with relatively large number, including *ndhB*, *ndhD*, *rpoB*, and *rpoC2*, were highlighted by different blue grid fill.

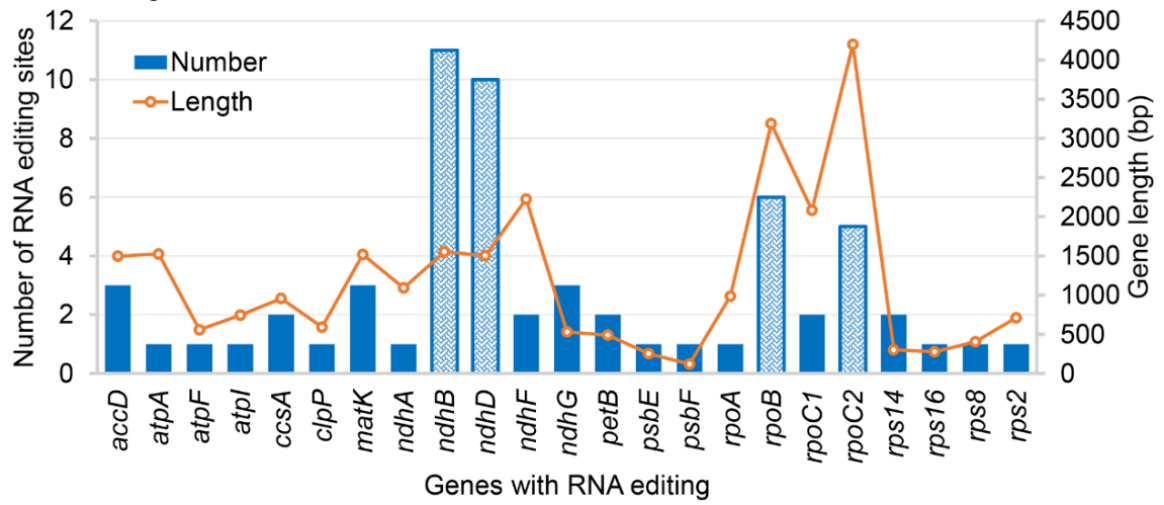

**Supplementary Figure 9.** Comparison of  $Ka/Ks$  ( $\omega$ ) values of protein-coding genes in *Carya* plastomes. Only the  $\omega$  values not equal to zero are shown.

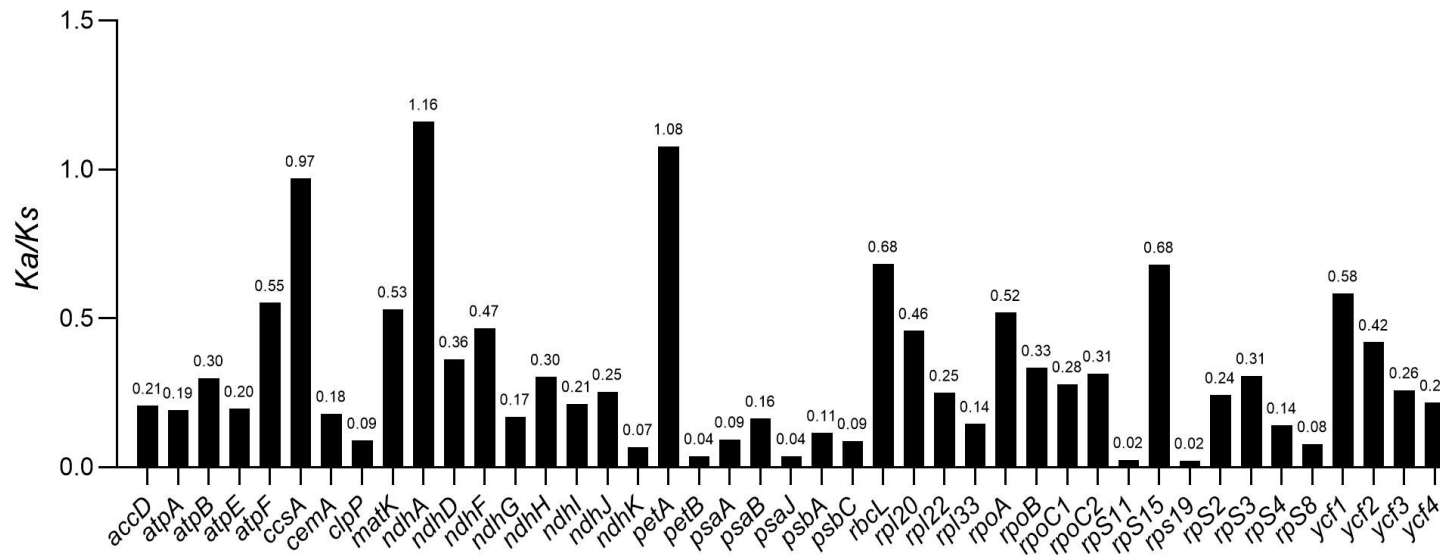

**Supplementary Figure 10** . Phylogenetic trees of *Carya* species and representative species in other genera of Juglandaceae inferred from the datasets of LSC regions using Bayesian Inference (BI) and Maximum likelihood methods. The posterior probability (PP) and bootstrap (BS) values that supported each node are shown above the branches. The colors in green, light purple and pink indicate the outgroups, EA and NA *Carya* species, respectively.

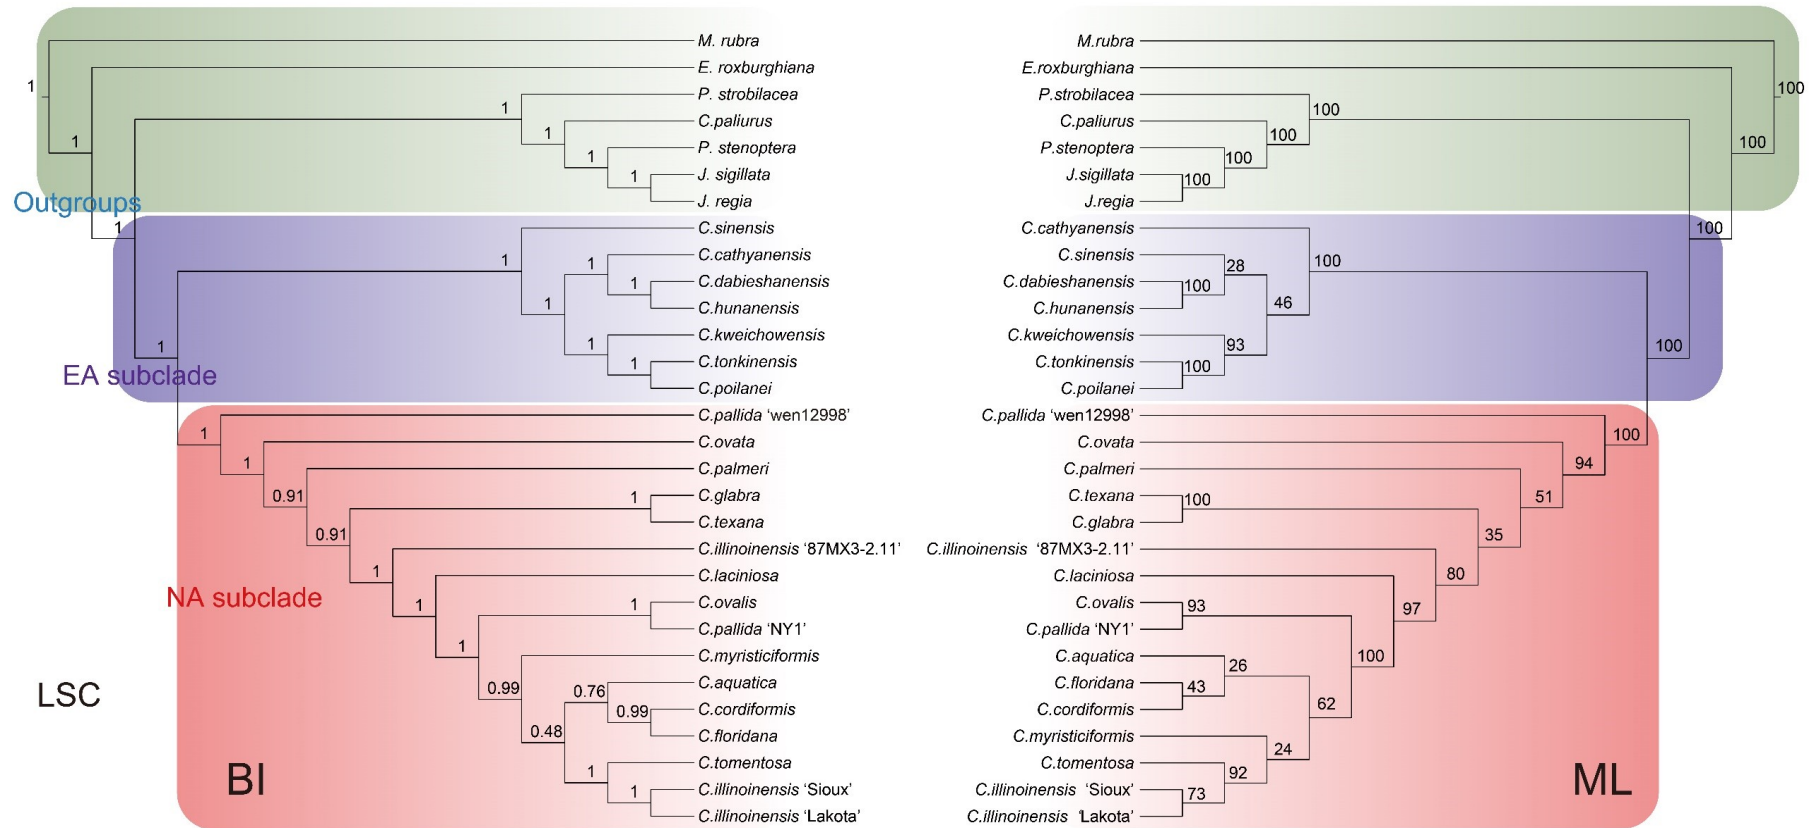

**Supplementary Figure 11.** Phylogenetic trees of *Carya* species and representative species in other genera of Juglandaceae inferred from the datasets of LSC-SSC regions using Bayesian Inference (BI) and Maximum likelihood methods. The posterior probability (PP) and bootstrap (BS) values that supported each node are shown above the branches. The colors in green, light purple and pink indicate the outgroups, EA and NA *Carya* species, respectively.

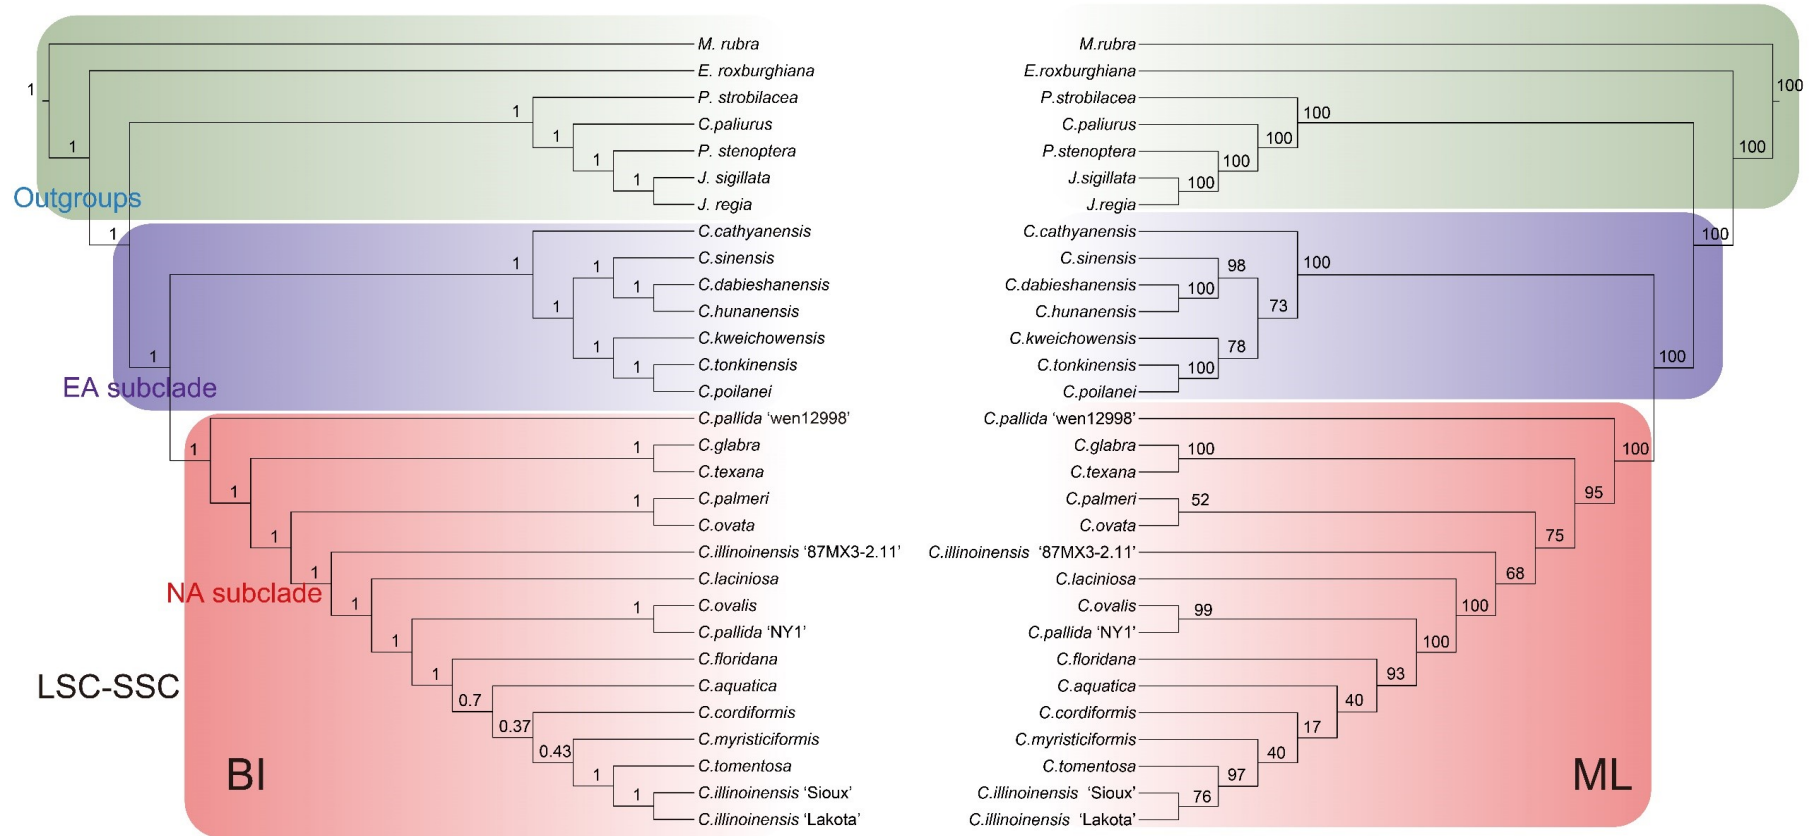

**Supplementary Figure 12.** Phylogenetic trees of *Carya* species and representative species in other genera of Juglandaceae inferred from the datasets of SSC regions using Bayesian Inference (BI) and Maximum likelihood methods. The posterior probability (PP) and bootstrap (BS) values that supported each node are shown above the branches. The colors in green, light purple and pink indicate the outgroups, EA and NA *Carya* species, respectively.

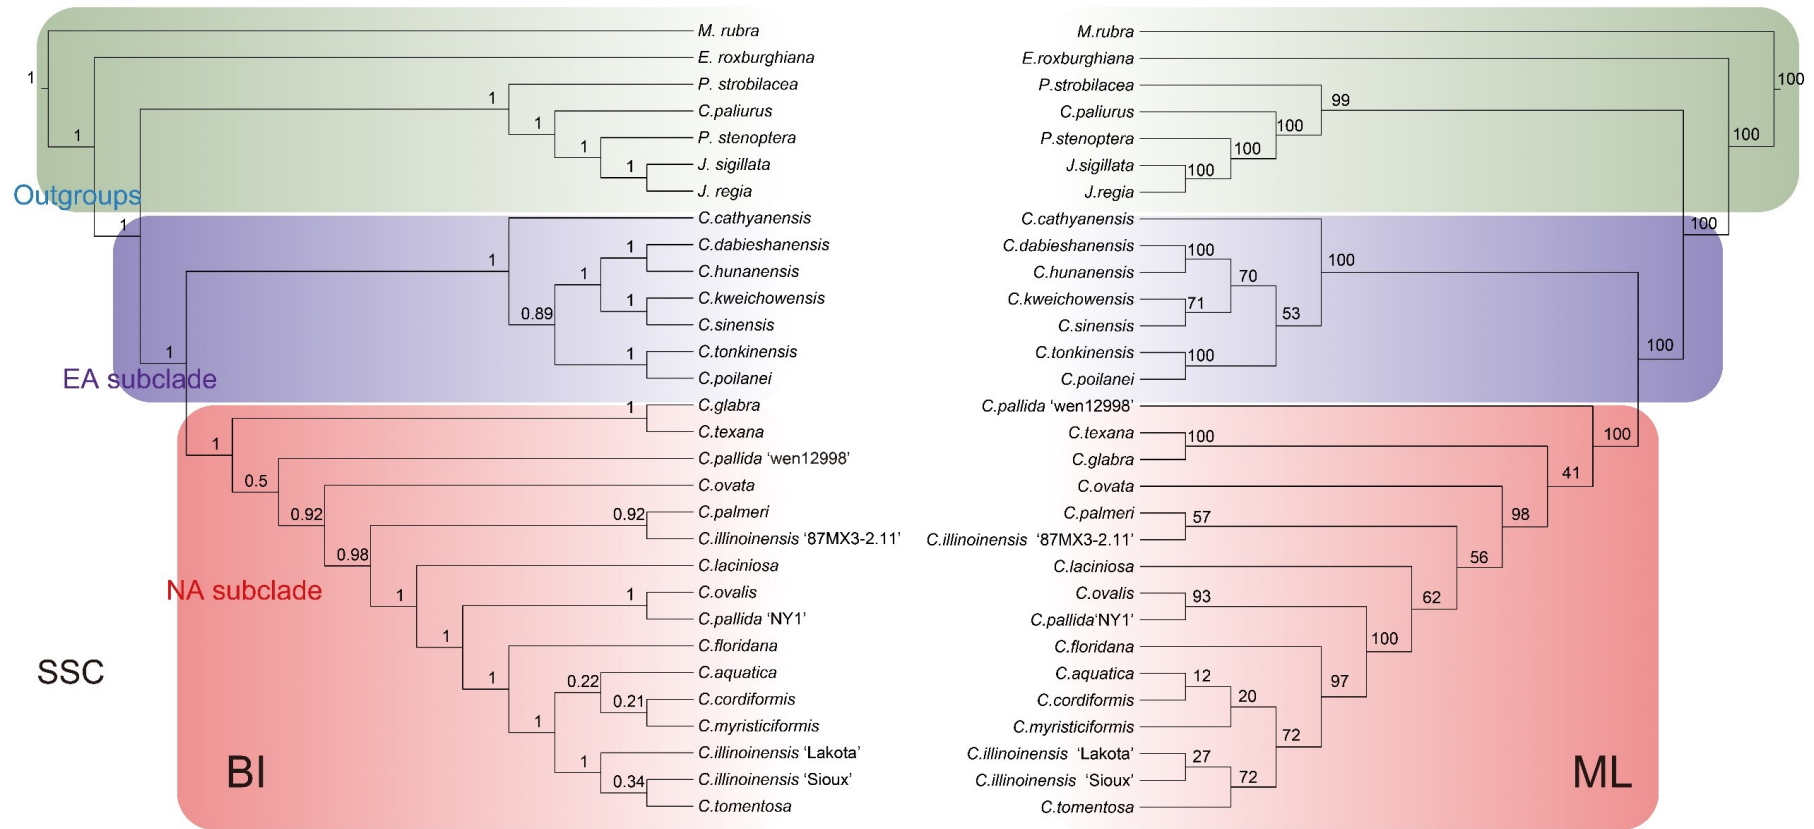

**Supplementary Figure 13.** Phylogenetic trees of *Carya* species and representative species in other genera of Juglandaceae inferred from the datasets of CDS regions using Bayesian Inference (BI) and Maximum likelihood methods. The posterior probability (PP) and bootstrap (BS) values that supported each node are shown above the branches. The colors in green, light purple and pink indicate the outgroups, EA and NA *Carya* species, respectively.

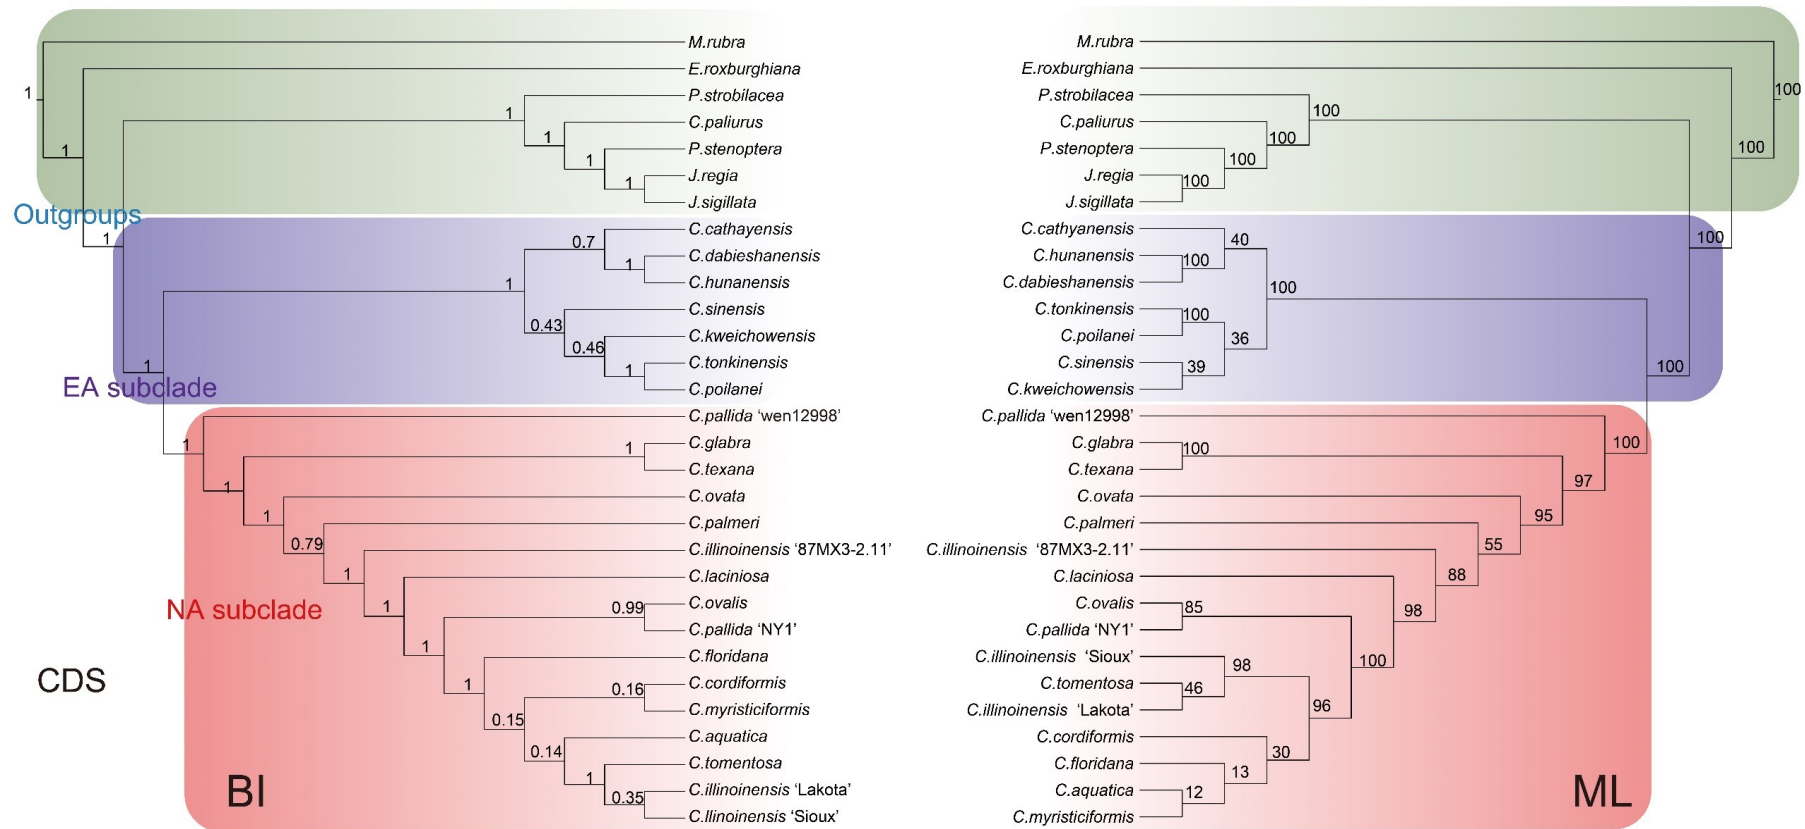



**Supplementary Figure 14.** Phylogenetic trees of *Carya* species and representative species in other genera of Juglandaceae inferred from the datasets of LSC-IR-SSC regions Bayesian Inference (BI) and Maximum likelihood methods. The posterior probability (PP) and bootstrap (BS) values that supported each node are shown above the branches. The colors in green, light purple and pink indicate the outgroups, EA and NA *Carya* species, respectively.

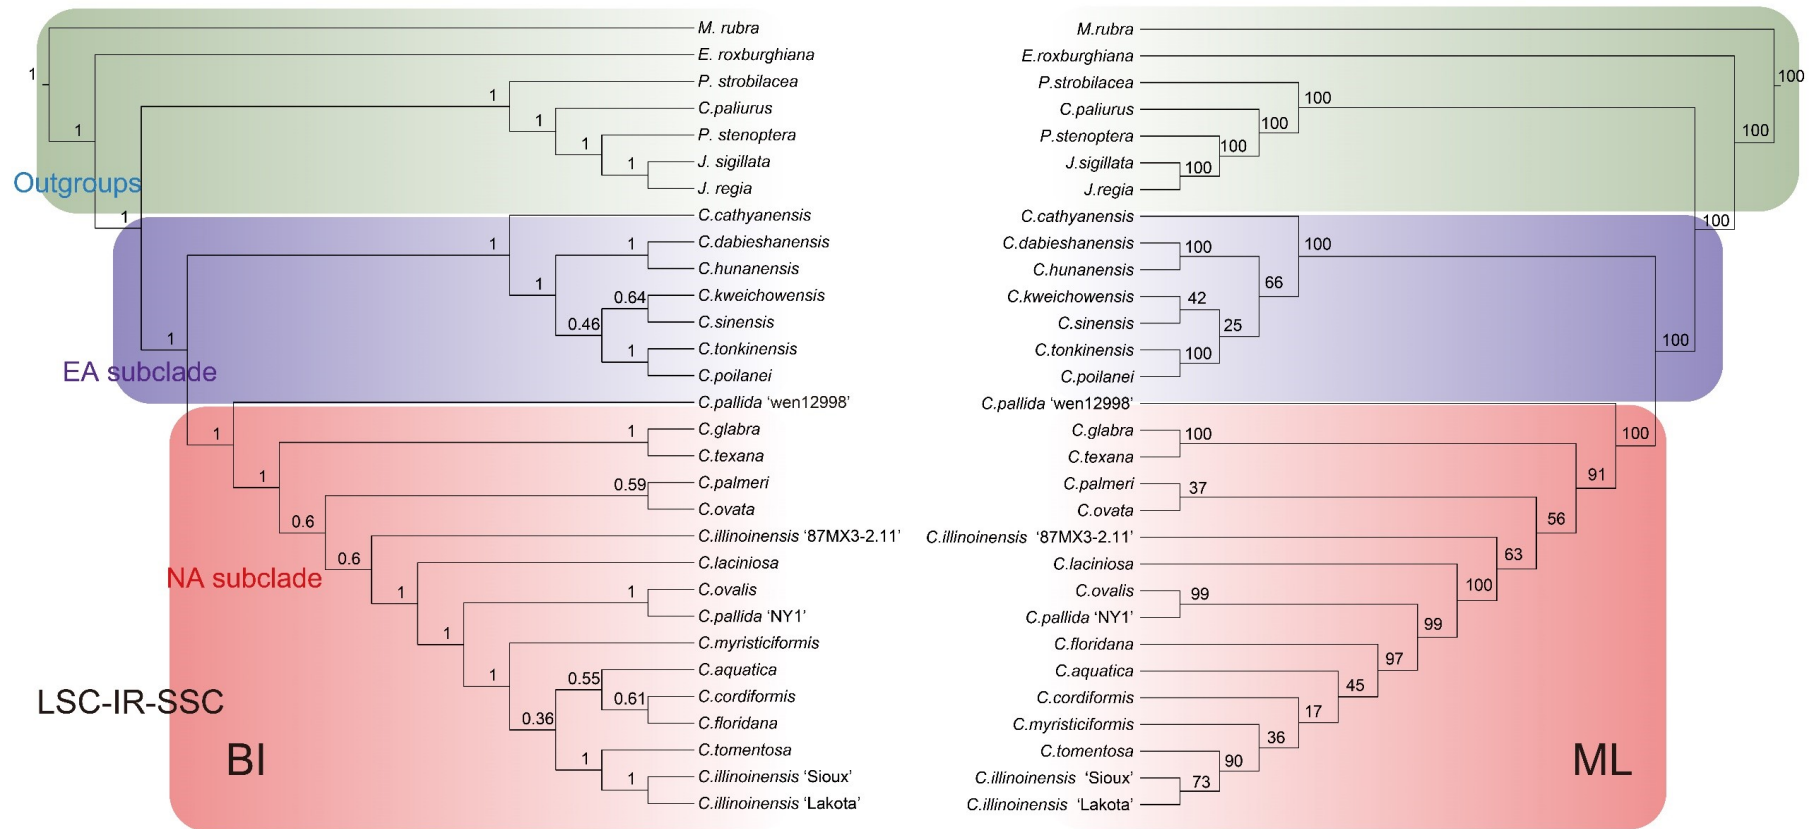

**Supplementary Figure 15.** Phylogenetic trees of *Carya* species and representative species in other genera of Juglandaceae inferred from the datasets of IR regions using Bayesian Inference (BI) and Maximum likelihood methods. The posterior probability (PP) and bootstrap (BS) values that supported each node are shown above the branches. The colors in green, light purple and pink indicate the outgroups, EA and NA *Carya* species, respectively.

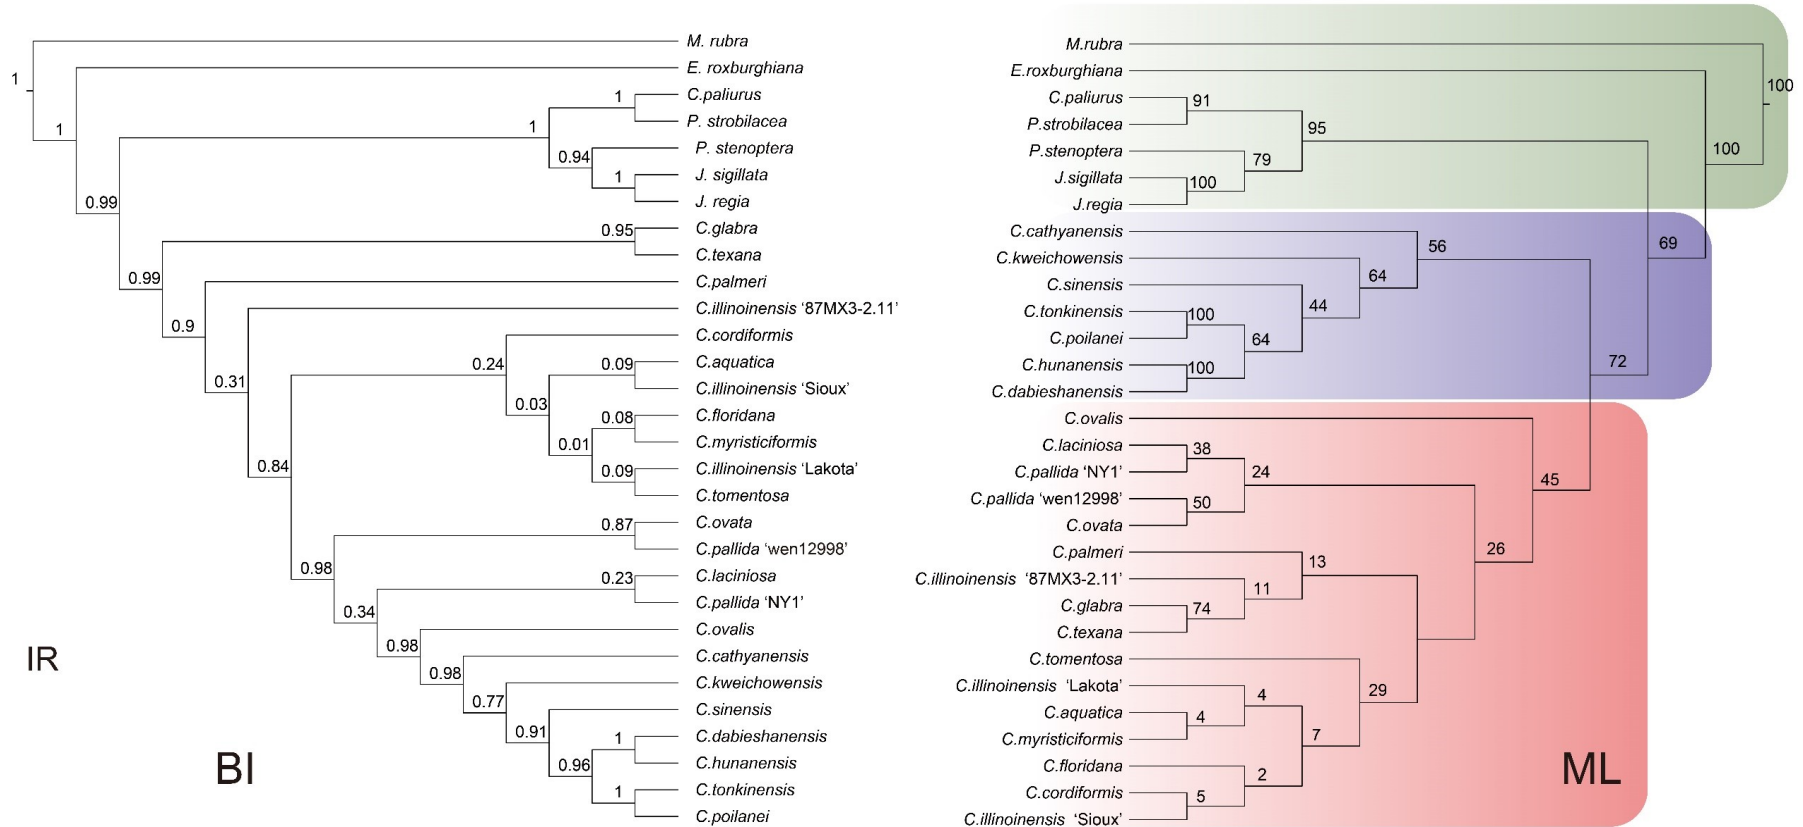

Supplementary Figure 16. The native geographical distributions of extant *Carya* species.

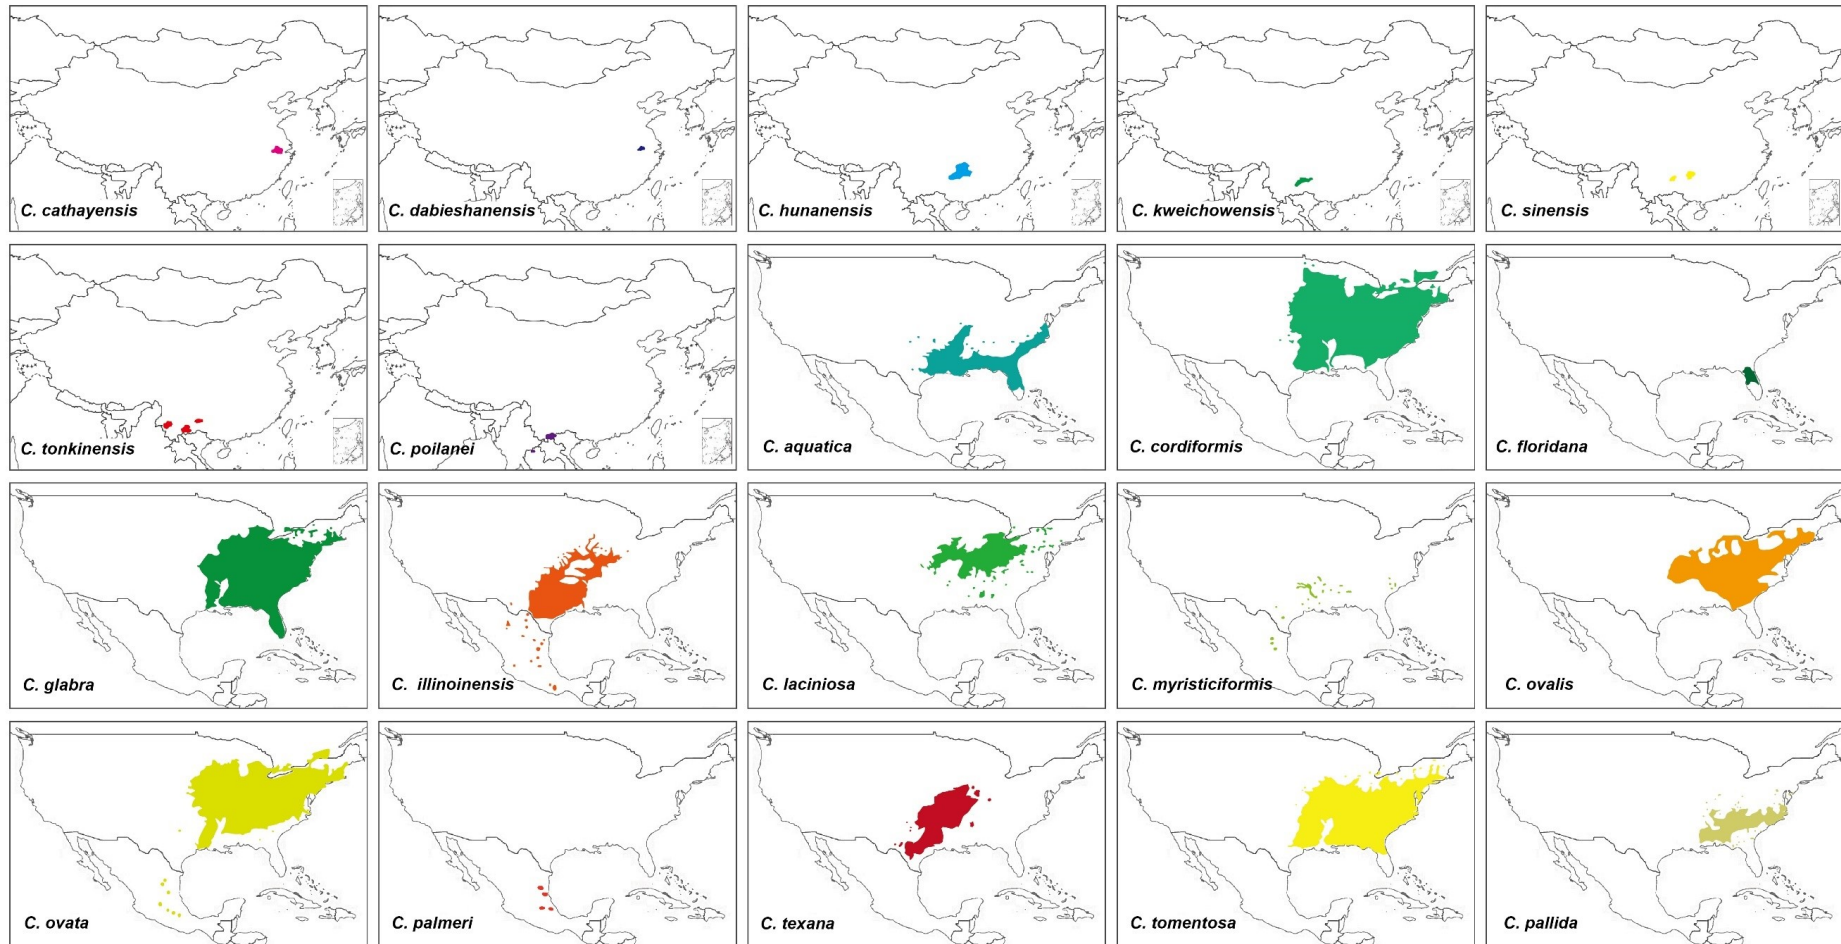

**Supplementary Figure 17.** Morphological features of *C. cathayensis* and *C. dabieshanensis*. (A), Nuts of *C. cathayensis*. (B), Nuts of *C. dabieshanensis*. (C) - (D), Statistics of fruit and nut indexes of *C. cathayensis* and *C. dabieshanensis*. The nut size was calculated from 10 trees with n = 20 fruits or nuts per three.

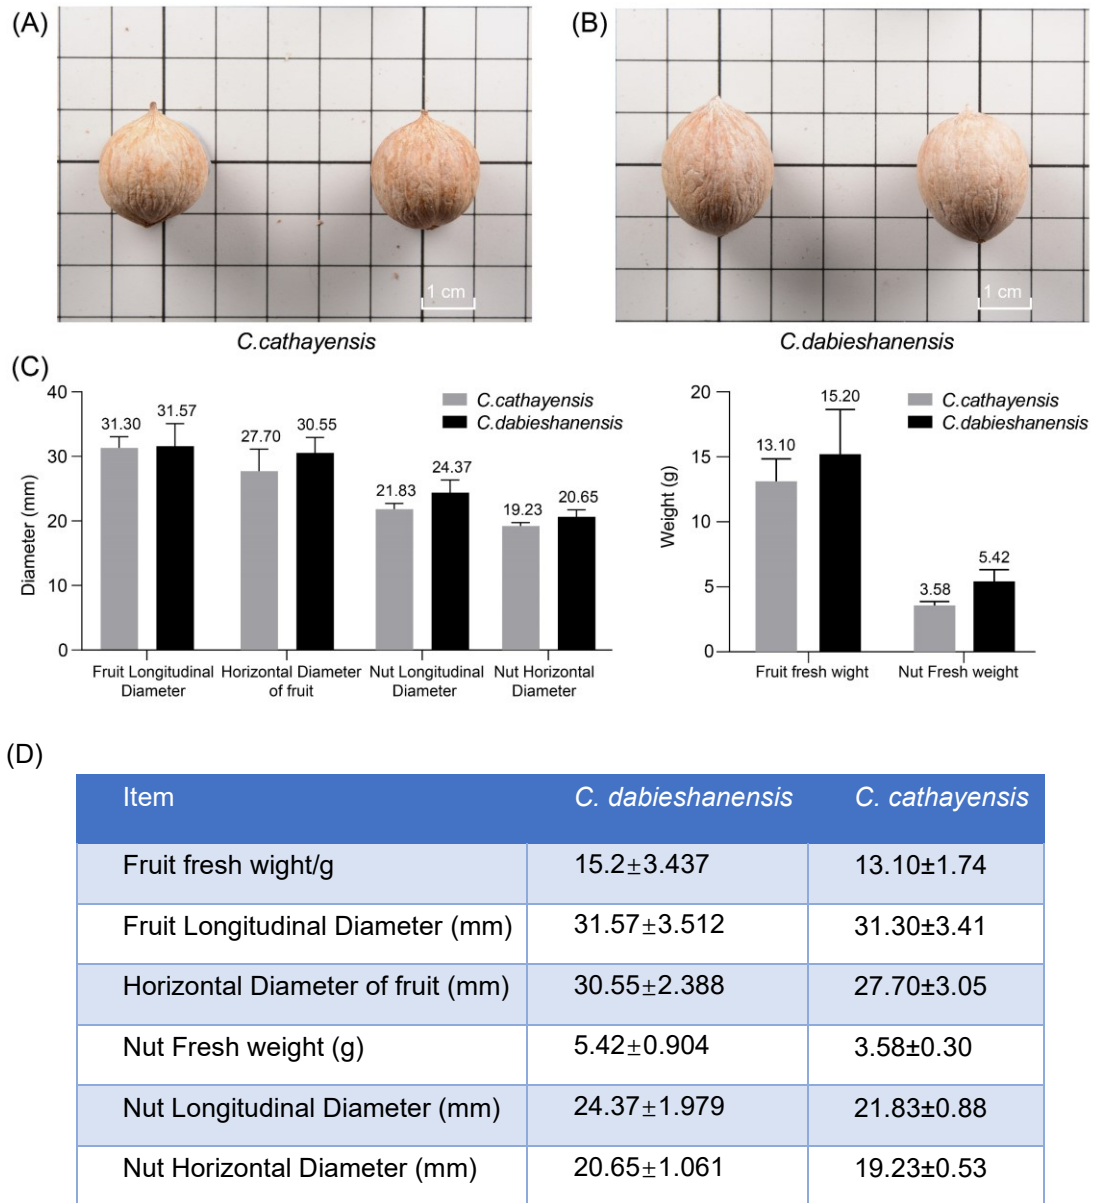

**Supplementary Tables**

**Supplementary Table 1. Information on sample collection and data sources for plastome assemblies of *Carya*.**

| species                          | Sampling site                                                                | longitude  | latitude  | altitude (m) | NCBI ID number | String length |
|----------------------------------|------------------------------------------------------------------------------|------------|-----------|--------------|----------------|---------------|
| <i>C. cathyanensis</i>           | Orchard in Zhejiang A&F University in Linan District, Zhejiang Province      | 119°43'42" | 30°15'16" | 38.0         | NA             | 29            |
| <i>C. dabieshanensis</i>         | Yanzihe Village Jinzhai District, Anhui Province                             | 115°49'24" | 31°16'22" | 712.5        | NA             | 49            |
| <i>C. hunanensis</i>             | Orchard in Zhejiang A&F University in Linan District, Zhejiang Province      | 119°43'42" | 30°15'16" | 38.0         | NA             | 19            |
| <i>C. kweichowensis</i>          | Qiannan Buyi and Miao Autonomous Prefecture, Guizhou Province                | 107°53'47" | 25°11'53" | 820.0        | NA             | 39            |
| <i>C. sinensis</i>               | Qiannan Buyi and Miao Autonomous Prefecture, Guizhou Province                | 106°44'4"  | 25°37'40" | 1000.6       | NA             | 19            |
| <i>C. tonkinensis</i>            | Conservatory in Zhejiang A&F University in Linan District, Zhejiang Province | 119°43'15" | 30°15'55" | 38.0         | NA             | 29            |
| <i>C. illinoensis</i><br>'Sioux' | Orchard in Zhejiang A&F University in Linan District, Zhejiang Province      | 119°43'42" | 30°15'16" | 38.0         | NA             | 40            |
| <i>C. poilanei</i>               | Jianshui County, Yunnan Province                                             | 102°51'36" | 23°23'42" | 1895.0       | SRX13427070    | 39            |
| <i>C. aquatica</i>               | —                                                                            | —          | —         | —            | SRR6804841     | 29            |
| <i>C. cordiformis</i>            | —                                                                            | —          | —         | —            | SRR6804840     | 39            |
| <i>C. floridana</i>              | —                                                                            | —          | —         | —            | SRR6804844     | 49            |
| <i>C. glabra</i>                 | —                                                                            | —          | —         | —            | SRR6804848     | 29            |
| <i>C. laciniosa</i>              | —                                                                            | —          | —         | —            | SRR6804855     | 29            |
| <i>C. myristiciformis</i>        | —                                                                            | —          | —         | —            | SRR6804845     | 39            |
| <i>C. ovalis</i>                 | —                                                                            | —          | —         | —            | SRR6804843     | 19            |
| <i>C. ovata</i>                  | —                                                                            | —          | —         | —            | SRR6804846     | 39            |
| <i>C. palmeri</i>                | —                                                                            | —          | —         | —            | SRR6804847     | 39            |
| <i>C. texana</i>                 | —                                                                            | —          | —         | —            | SRR6804850     | 49            |
| <i>C. tomentosa</i>              | —                                                                            | —          | —         | —            | SRR6804842     | 39            |

**Supplementary Table 2. Primers for validation of IR-SC boundaries and *Carya* plastome assemblies.**

| <b>IR-SC boundary</b> | <b>Forward primer sequence (5'-3')</b> | <b>Forward primer sequence (5'-3')</b> |
|-----------------------|----------------------------------------|----------------------------------------|
| <i>ycf1~ndhF</i>      | AATCGAGAAGAAAGTATCAGCAA                | TGGATTGGTATGAATTTGTGAC                 |
| <i>rrn23S~ndhF</i>    | AAAAGTTACTCTAGGGATAACAGG               | TGGATTGGTATGAATTTGTGAC                 |
| IRa-LSC               | CACGGCCATACATAACATAGAAATC              | GTTCTTTACATTTCTTCCTAGCGG               |
| LSC-IRb               | GCTCGGGACCAAGTTATTATTATTC              | CACGGCCATACATAACATAGAAATC              |
| IRb-SSC               | CTCCGAGCTCGGATTATAGAAGAAG              | TGGATTGGTATGAATTTGTGAC                 |
| SSC-IRa               | GTAATTGGTAGTAAGAAGGATGCC               | CTCCGAGCTCGGATTATAGAAGAAG              |

**Supplementary Table 3. Species information used for phylogeny analysis.**

| <b>Family</b> | <b>Species</b>                        | <b>GenBank accession</b> |
|---------------|---------------------------------------|--------------------------|
|               | <i>Carya cathayensis</i>              | MW410227                 |
|               | <i>Carya aquatica</i>                 | MW255965                 |
|               | <i>Carya cordiformis</i>              | MW368387                 |
|               | <i>Carya dabieshanensis</i>           | MW410228                 |
|               | <i>Carya floridana</i>                | MW410229                 |
|               | <i>Carya glabra</i>                   | MW410230                 |
|               | <i>Carya hunanensis</i>               | MW298527                 |
|               | <i>Carya illinoensis</i> ‘sioux’      | MW410238                 |
|               | <i>Carya kweichowensis</i>            | MW410237                 |
|               | <i>Carya laciniosa</i>                | MW410231                 |
|               | <i>Carya myristiciformis</i>          | MW410232                 |
|               | <i>Carya ovalis</i>                   | MW440674                 |
|               | <i>Carya ovata</i>                    | MW410233                 |
|               | <i>Carya palmeri</i>                  | MW410234                 |
| Juglandaceae  | <i>Carya sinensis</i>                 | MW421595                 |
|               | <i>Carya pallinda</i> ‘NY1’           | MT554070                 |
|               | <i>Carya pallinda</i> ‘Wen12998’      | MT554071                 |
|               | <i>Carya texana</i>                   | MW410235                 |
|               | <i>Carya tomentosa</i>                | MW410236                 |
|               | <i>Carya tonkinensis</i>              | MW368388                 |
|               | <i>Carya poilanei</i>                 | ON568300                 |
|               | <i>Juglans regia</i>                  | NC_028617.1              |
|               | <i>Juglans sigillata</i>              | NC_031373.1              |
|               | <i>Pterocarya stenoptera</i>          | MN262640.1               |
|               | <i>Platycarya strobilacea</i>         | NC_035413.1              |
|               | <i>Cyclocarya paliurus</i>            | NC_034315.1              |
|               | <i>Engelhardia roxburghiana</i>       | NC_046434.1              |
|               | <i>Carya sinensis</i>                 | KX703001.1               |
|               | <i>Carya illinoensis</i> ‘87MX3-2.11’ | MH909600.1               |
|               | <i>Carya illinoensis</i> ‘Lakota’     | MH909599.1               |
| Myricaceae    | <i>Myrica rubra</i>                   | NC_035006.1              |

**Supplementary Table 4. Summary of intron-containing genes in *Carya* plastomes.**

| Gene            | Region     | Exon I length (bp)                  | Intron I length (bp)                                   | Exon II length (bp)                 | Intron II length (bp)                           | Exon III length (bp) |
|-----------------|------------|-------------------------------------|--------------------------------------------------------|-------------------------------------|-------------------------------------------------|----------------------|
| <i>atpF</i>     | LSC        | 411                                 | (759~764) <sup>a</sup> , (747~755) <sup>b</sup>        | 147,144 <sup>c</sup>                | -                                               | -                    |
| <i>clpP</i>     | LSC        | 228                                 | (611~615) <sup>a</sup> , (609~620) <sup>b</sup>        | 294                                 | (848~851) <sup>a</sup> , (847~855) <sup>b</sup> | 69                   |
| <i>ndhA</i>     | SSC        | 537                                 | (1186~1121) <sup>a</sup> ,<br>(1167~1229) <sup>b</sup> | 555                                 | -                                               | -                    |
| <i>ndhB</i>     | IR         | 792                                 | 671                                                    | 762                                 | -                                               | -                    |
| <i>rpl2</i>     | IR         | 434 <sup>a</sup> , 471 <sup>b</sup> | (663~692) <sup>a</sup> , (656~662) <sup>b</sup>        | 391 <sup>a</sup> , 390 <sup>b</sup> | -                                               | -                    |
| <i>rpoC1</i>    | LSC        | 1626                                | (819~831) <sup>a</sup> , (811~814) <sup>b</sup>        | 456                                 | -                                               | -                    |
| <i>rps12</i>    | LSC-<br>IR | 114                                 | 537                                                    | 231                                 | -                                               | 30                   |
| <i>rps16</i>    | LSC        | 234, 225 <sup>d</sup>               | (888~897) <sup>a</sup> , (896~904) <sup>b</sup>        |                                     | -                                               | -                    |
| <i>ycf3</i>     | LSC        | 155 <sup>a</sup> , 161 <sup>b</sup> | (792~796) <sup>a</sup> , (790~791) <sup>b</sup>        | 226 <sup>a</sup> , 223 <sup>b</sup> | 720~721                                         | 126                  |
| <i>trnA-UGC</i> | IR         | 38                                  | (805~808) <sup>a</sup> , 807 <sup>b</sup>              | 35                                  | -                                               | -                    |
| <i>trnI-GAU</i> | IR         | 37                                  | 955                                                    | 35                                  | -                                               | -                    |
| <i>trnL-UAA</i> | LSC        | 35                                  | 526                                                    | 50                                  | -                                               | -                    |
| <i>trnS-CGA</i> | LSC        | 23                                  | (724~726) <sup>a</sup> , (685~725) <sup>b</sup>        | 38                                  | -                                               | -                    |
| <i>trnV-UAC</i> | LSC        | 37                                  | 617                                                    | 36                                  | -                                               | -                    |

Note: a, Exist in EA species; b, Exist in NA species; c, Exon II length of *atpF* is 144 bp in *C. dabieshanensis*; d, Exon I length of *rps16* is 225 bp in *C. tonkinensis*.



**Supplementary Table 5. The numbers and repeat sequences of each SSR type in *Carya* plastomes.**

| Species                       | Number |    |    |    |    |    |       | Repeat sequence type                                  |
|-------------------------------|--------|----|----|----|----|----|-------|-------------------------------------------------------|
|                               | P1     | P2 | P3 | P4 | P5 | P6 | Total |                                                       |
| <i>C. cathayensis</i>         | 85     | 3  | 2  | 2  | 1  | 0  | 93    | A/T/C/G/AT/TA/ATT/AATA/AAATA                          |
| <i>C. dabieshanensis</i>      | 89     | 6  | 4  | 2  | 2  | 2  | 105   | A/T/G/AT/TA/AAT/ATT/TTA/AATA/TATAT/TCATATAATTC/TATTAG |
| <i>C. hunanensis</i>          | 87     | 6  | 4  | 2  | 2  | 2  | 103   | A/T/AT/TA/AAT/ATT/TTA/AATA/TATAT/TCATA/TAATTC/TATTAG  |
| <i>C. kweichowensis</i>       | 82     | 5  | 3  | 2  | 0  | 0  | 92    | A/T/C/AT/TA/AAT/ATT/AATA                              |
| <i>C. sinensis</i>            | 89     | 6  | 2  | 2  | 2  | 0  | 101   | A/T/C/G/AT/TA/ATT/AATA/ATATA/TCATA                    |
| <i>C. tonkinensis</i>         | 91     | 8  | 3  | 2  | 2  | 0  | 106   | A/T/C/G/AT/TA/AAT/ATT/AATA/TATAT                      |
| <i>C. poilanei</i>            | 91     | 8  | 3  | 2  | 2  | 0  | 106   | A/T/C/G/AT/TA/AAT/ATT/AATA/TATAT                      |
| <i>C. aquatica</i>            | 64     | 6  | 3  | 2  | 1  | 0  | 76    | A/T/AT/TA/AAT/ATT/AAGA/AATA/TATTT                     |
| <i>C. cordiformis</i>         | 66     | 6  | 3  | 2  | 1  | 1  | 79    | A/T/AT/TA/AAT/ATT/AAGA/AATA/TATTT/ATTAAT              |
| <i>C. floridana</i>           | 67     | 6  | 3  | 2  | 1  | 0  | 79    | A/T/AT/TA/AAT/ATT/AAGA/AATA/TATTT                     |
| <i>C. glabra</i>              | 66     | 6  | 3  | 2  | 0  | 0  | 77    | A/T/AT/TA/AAT/ATT/AAGA/AATA                           |
| <i>C. illinoensis</i> ‘Sioux’ | 66     | 5  | 3  | 2  | 1  | 1  | 78    | A/T/AT/TA/AAT/ATT/AAGA/AATA/TATTT/TAGATA              |
| <i>C. laciniosa</i>           | 65     | 7  | 3  | 3  | 1  | 0  | 79    | A/T/G/AT/TA/AAT/ATT/AAGA/AATA/TTAT/TATTT              |
| <i>C. myristiciformis</i>     | 66     | 6  | 3  | 2  | 1  | 0  | 78    | A/T/AT/TA/AAT/ATT/AAGA/AATA/TATTT                     |
| <i>C. ovalis</i>              | 70     | 6  | 3  | 2  | 1  | 0  | 82    | A/T/AT/TA/AAT/ATT/AAGA/AATA/TATTT                     |
| <i>C. ovata</i>               | 68     | 5  | 3  | 3  | 0  | 2  | 81    | A/T/AT/TA/AAT/ATT/AAGA/AATA/ATTAAT/ATTATA             |
| <i>C. palmeri</i>             | 69     | 6  | 3  | 2  | 1  | 1  | 82    | A/T/C/AT/TA/AAT/ATT/AAGA/TAAAATATA/AATATA             |
| <i>C. texana</i>              | 65     | 6  | 3  | 2  | 0  | 0  | 76    | A/T/AT/TA/AAT/ATT/AAGA/AATA                           |
| <i>C. tomentosa</i>           | 66     | 6  | 3  | 2  | 1  | 1  | 79    | A/T/AT/TA/AAT/ATT/AAGA/AATA/TATTT/TAGATA              |

**Supplementary Table 6. Codon usage in plastomes of assemblies and *J. regia*.**

| Species                       | Codon number | ENC   | Codon GC content (%) |                          |                          |                          |
|-------------------------------|--------------|-------|----------------------|--------------------------|--------------------------|--------------------------|
|                               |              |       | Total                | 1 <sup>st</sup> position | 2 <sup>nd</sup> position | 3 <sup>rd</sup> position |
| <i>C. cathayensis</i>         | 21,190       | 48.88 | 37.33                | 45.76                    | 37.62                    | 28.60                    |
| <i>C. dabieshanensis</i>      | 21,196       | 48.96 | 37.34                | 45.78                    | 37.60                    | 28.64                    |
| <i>C. hunanensis</i>          | 21,196       | 48.95 | 37.34                | 45.77                    | 37.61                    | 28.64                    |
| <i>C. kweichowensis</i>       | 21,204       | 48.93 | 37.35                | 45.80                    | 37.63                    | 28.62                    |
| <i>C. sinensis</i>            | 21,207       | 48.96 | 37.35                | 45.75                    | 37.62                    | 28.67                    |
| <i>C. tonkinensis</i>         | 21,206       | 56.51 | 37.32                | 39.59                    | 31.12                    | 41.26                    |
| <i>C. poilanei</i>            | 21,206       | 56.52 | 37.32                | 39.59                    | 31.18                    | 41.20                    |
| <i>C. aquatica</i>            | 21,210       | 48.98 | 37.37                | 45.82                    | 37.59                    | 28.70                    |
| <i>C. cordiformis</i>         | 21,210       | 48.97 | 37.37                | 45.82                    | 37.60                    | 28.70                    |
| <i>C. floridana</i>           | 21,210       | 48.98 | 37.38                | 45.83                    | 37.60                    | 28.70                    |
| <i>C. glabra</i>              | 21,210       | 48.97 | 37.38                | 45.82                    | 37.61                    | 28.70                    |
| <i>C. illinoensis</i> ‘Sioux’ | 21,210       | 48.98 | 37.38                | 45.82                    | 37.60                    | 28.70                    |
| <i>C. laciniosa</i>           | 21,210       | 48.93 | 37.35                | 45.80                    | 37.63                    | 28.62                    |
| <i>C. myristiciformis</i>     | 21,210       | 48.98 | 37.37                | 45.82                    | 37.60                    | 28.70                    |
| <i>C. ovalis</i>              | 21,208       | 48.98 | 37.38                | 45.83                    | 37.59                    | 28.71                    |
| <i>C. ovata</i>               | 21,210       | 49.00 | 37.39                | 45.81                    | 37.61                    | 28.74                    |
| <i>C. palmeri</i>             | 21,210       | 48.99 | 37.38                | 45.82                    | 37.60                    | 28.72                    |
| <i>C. texana</i>              | 21,210       | 48.96 | 37.35                | 45.75                    | 37.62                    | 28.67                    |
| <i>C. tomentosa</i>           | 21,210       | 48.98 | 37.38                | 45.82                    | 37.60                    | 28.71                    |
| <i>J. regia</i>               | 21,265       | 48.78 | 37.20                | 45.77                    | 37.49                    | 28.33                    |

Note: ENC, Effective Number of Codon.

**Supplementary Table 7. Predicted RNA-editing sites in the protein-coding genes of *Carya* plastomes.**

| No. | Gene        | Nucleotide position | Amino acid position | Codon change | Amino acid change | value | Note                                                      |
|-----|-------------|---------------------|---------------------|--------------|-------------------|-------|-----------------------------------------------------------|
| 1   | <i>accD</i> | 154                 | 52                  | CGG→UGG      | R→W               | 1     | 19 species                                                |
| 2   | <i>accD</i> | 775                 | 259                 | CAU→UAU      | H→Y               | 0.8   | 19 species                                                |
| 3   | <i>accD</i> | 815                 | 272                 | UCG→UUG      | S→L               | 0.8   | 19 species                                                |
| 4   | <i>atpA</i> | 914                 | 305                 | UCA→UUA      | S→L               | 1     | 19 species                                                |
| 5   | <i>atpF</i> | 92                  | 31                  | CCA→CUA      | P→L               | 0.86  | 19 species                                                |
| 6   | <i>atpI</i> | 211                 | 71                  | CUC→UUC      | L→F               | 1     | only in <i>C. poilanei</i>                                |
| 7   | <i>atpI</i> | 629                 | 210                 | UCA→UUA      | S→L               | 1     | 19 species                                                |
| 8   | <i>ccsA</i> | 494                 | 165                 | UCU→UUU      | S→F               | 0.86  | Not found in <i>C. tonkenensis</i> and <i>C. poilanei</i> |
| 9   | <i>ccsA</i> | 500                 | 167                 | UCU→UUU      | S→F               | 0.86  | Only in <i>C. tonkenensis</i> and <i>C. poilanei</i>      |
| 10  | <i>clpP</i> | 559                 | 187                 | CAU→UAU      | H→Y               | 1     | 19 species                                                |
| 11  | <i>matK</i> | 640                 | 214                 | CAU→UAU      | H→Y               | 1     | 19 species                                                |
| 12  | <i>matK</i> | 1177                | 393                 | CGG→UGG      | R→W               | 1     | Not found in <i>C. cathayensis</i>                        |
| 13  | <i>matK</i> | 1183                | 395                 | CGG→UGG      | R→W               | 1     | Only in <i>C. sinensis</i>                                |
| 14  | <i>ndhA</i> | 1028                | 343                 | UCU→UUU      | S→F               | 1     | Only in <i>C. tonkenensis</i> and <i>C. poilanei</i>      |
| 15  | <i>ndhB</i> | 149                 | 50                  | UCA→UUA      | S→L               | 1     | 19 species                                                |
| 16  | <i>ndhB</i> | 467                 | 156                 | CCA→CUA      | P→L               | 1     | 19 species                                                |
| 17  | <i>ndhB</i> | 586                 | 196                 | CAU→UAU      | H→Y               | 1     | 19 species                                                |
| 18  | <i>ndhB</i> | 611                 | 204                 | UCA→UUA      | S→L               | 0.8   | 19 species                                                |
| 19  | <i>ndhB</i> | 737                 | 246                 | CCA→CUA      | P→L               | 1     | 19 species                                                |
| 20  | <i>ndhB</i> | 746                 | 249                 | UCU→UUU      | S→F               | 1     | 19 species                                                |
| 21  | <i>ndhB</i> | 845                 | 282                 | UCA→UUA      | S→L               | 1     | 19 species                                                |
| 22  | <i>ndhB</i> | 851                 | 284                 | UCA→UUA      | S→L               | 1     | 19 species                                                |

|    |             |      |     |         |     |     |                                                           |
|----|-------------|------|-----|---------|-----|-----|-----------------------------------------------------------|
| 23 | <i>ndhB</i> | 1127 | 376 | UCA→UUA | S→L | 1   | 19 species                                                |
| 24 | <i>ndhB</i> | 1270 | 424 | CAU→UAU | H→Y | 1   | 19 species                                                |
| 25 | <i>ndhB</i> | 1502 | 501 | CCA→CUA | P→L | 1   | 19 species                                                |
| 26 | <i>ndhD</i> | 2    | 1   | ACG→AUG | U→M | 1   | 19 species                                                |
| 27 | <i>ndhD</i> | 305  | 102 | UCA→UUA | S→L | 1   | 19 species                                                |
| 28 | <i>ndhD</i> | 313  | 105 | CGG→UGG | R→W | 0.8 | 19 species                                                |
| 29 | <i>ndhD</i> | 383  | 128 | UCA→UUA | S→L | 1   | 19 species                                                |
| 30 | <i>ndhD</i> | 599  | 200 | UCA→UUA | S→L | 1   | 19 species                                                |
| 31 | <i>ndhD</i> | 674  | 225 | UCA→UUA | S→L | 1   | 19 species                                                |
| 32 | <i>ndhD</i> | 878  | 293 | UCA→UUA | S→L | 1   | 19 species                                                |
| 33 | <i>ndhD</i> | 887  | 296 | CCC→CUC | P→L | 1   | 19 species                                                |
| 34 | <i>ndhD</i> | 1298 | 433 | UCA→UUA | S→L | 0.8 | 19 species                                                |
| 35 | <i>ndhD</i> | 1405 | 469 | CUU→UUU | L→F | 0.8 | 19 species                                                |
| 36 | <i>ndhF</i> | 586  | 196 | CUU→UUU | L→F | 0.8 | 19 species                                                |
| 37 | <i>ndhF</i> | 1780 | 594 | CCA→UCA | P→S | 1   | Only in <i>C. floridana</i>                               |
| 38 | <i>ndhG</i> | 166  | 56  | CAU→UAU | H→Y | 0.8 | 19 species                                                |
| 39 | <i>ndhG</i> | 314  | 105 | ACA→AUA | U→I | 0.8 | 19 species                                                |
| 40 | <i>ndhG</i> | 494  | 165 | GCU→GUU | A→V | 0.8 | 19 species                                                |
| 41 | <i>petB</i> | 373  | 125 | CCC→UCC | P→S | 1   | Only in <i>C. dabieshanensis</i> and <i>C. hunanensis</i> |
| 42 | <i>petB</i> | 452  | 151 | CCA→CUA | P→L | 1   | 19 species                                                |
| 43 | <i>psbE</i> | 214  | 72  | CCU→UCU | P→S | 1   | 19 species                                                |
| 44 | <i>psbF</i> | 77   | 26  | UCU→UUU | S→F | 1   | 19 species                                                |
| 45 | <i>rpoA</i> | 830  | 277 | UCA→UUA | S→L | 1   | 19 species                                                |
| 46 | <i>rpoB</i> | 314  | 105 | UCU→UUU | S→F | 1   | 19 species                                                |
| 47 | <i>rpoB</i> | 527  | 176 | UCA→UUA | S→L | 1   | 19 species                                                |

|    |              |      |      |         |     |      |                                                             |
|----|--------------|------|------|---------|-----|------|-------------------------------------------------------------|
| 48 | <i>rpoB</i>  | 542  | 181  | UCG→UUG | S→L | 1    | 19 species                                                  |
| 49 | <i>rpoB</i>  | 586  | 196  | CUU→UUU | L→F | 1    | Not found in <i>C. sinensis</i> and <i>C. kweichowensis</i> |
| 50 | <i>rpoB</i>  | 1976 | 659  | UCU→UUU | S→F | 1    | 19 species                                                  |
| 51 | <i>rpoB</i>  | 2402 | 801  | UCA→UUA | S→L | 0.86 | 19 species                                                  |
| 52 | <i>rpoC1</i> | 62   | 21   | UCA→UUA | S→L | 1    | 19 species                                                  |
| 53 | <i>rpoC1</i> | 278  | 93   | UCU→UUU | S→F | 1    | 19 species                                                  |
| 54 | <i>rpoC2</i> | 1456 | 486  | CGC→UGC | R→C | 0.86 | 19 species                                                  |
| 55 | <i>rpoC2</i> | 1597 | 533  | CUU→UUU | L→F | 1    | 19 species                                                  |
| 56 | <i>rpoC2</i> | 2345 | 782  | GCU→GUU | A→V | 1    | 19 species                                                  |
| 57 | <i>rpoC2</i> | 3146 | 1049 | ACC→AUC | U→I | 0.86 | 19 species                                                  |
| 58 | <i>rpoC2</i> | 3764 | 1255 | UCA→UUA | S→L | 0.86 | 19 species                                                  |
| 59 | <i>rps14</i> | 80   | 27   | CCC→CUC | P→L | 1    | 19 species                                                  |
| 60 | <i>rps14</i> | 149  | 50   | CCA→CUA | P→L | 1    | 19 species                                                  |
| 61 | <i>rps16</i> | 218  | 73   | UCA→UUA | S→L | 0.83 | 19 species                                                  |
| 62 | <i>rps8</i>  | 172  | 58   | CUU→UUU | L→F | 1    | only in <i>C. laciniosa</i>                                 |
| 63 | <i>rps2</i>  | 248  | 83   | UCA→UUA | S→L | 1    | 19 species                                                  |

---

**Supplementary Table 8.  $Ka/Ks$  ( $\omega$ ) and nucleotide polymorphisms of protein-coding Gene in *Carya* plastomes.**

| Gene        | $Ka/Ks$ ( $\omega$ ) | $\pi$    | $\theta$ | Gene         | $Ka/Ks$ ( $\omega$ ) | $\pi$    | $\theta$ |
|-------------|----------------------|----------|----------|--------------|----------------------|----------|----------|
| <i>accD</i> | 0.206883             | 0.002260 | 0.002680 | <i>psbH</i>  | 0.000000             | 0.000900 | 0.001290 |
| <i>atpA</i> | 0.191243             | 0.001340 | 0.002440 | <i>psbI</i>  | 0.000000             | 0.001790 | 0.002580 |
| <i>atpB</i> | 0.299204             | 0.001400 | 0.000970 | <i>psbJ</i>  | 0.000000             | 0.000000 | 0.000000 |
| <i>atpE</i> | 0.196416             | 0.001480 | 0.001420 | <i>psbK</i>  | 0.000000             | 0.001070 | 0.001540 |
| <i>atpF</i> | 0.551268             | 0.002970 | 0.003110 | <i>psbL</i>  | 0.000000             | 0.010100 | 0.007340 |
| <i>atpH</i> | 0.000000             | 0.000000 | 0.000000 | <i>psbM</i>  | 0.000000             | 0.000000 | 0.000000 |
| <i>atpI</i> | 0.000000             | 0.001210 | 0.001540 | <i>psbT</i>  | 0.000000             | 0.004550 | 0.002650 |
| <i>ccsA</i> | 0.969747             | 0.004290 | 0.005380 | <i>psbZ</i>  | 0.000000             | 0.001610 | 0.003030 |
| <i>cemA</i> | 0.179279             | 0.001950 | 0.003730 | <i>rbcL</i>  | 0.682693             | 0.001490 | 0.001800 |
| <i>clpP</i> | 0.089417             | 0.001350 | 0.001450 | <i>rpl14</i> | 0.000000             | 0.001970 | 0.004650 |
| <i>matK</i> | 0.530389             | 0.003300 | 0.005840 | <i>rpl16</i> | 0.000000             | 0.002220 | 0.002090 |
| <i>ndhA</i> | 1.160245             | 0.002630 | 0.002620 | <i>rpl2</i>  | 0.000000             | 0.000000 | 0.000000 |
| <i>ndhB</i> | 0.000000             | 0.000070 | 0.000180 | <i>rpl20</i> | 0.457265             | 0.003800 | 0.004850 |
| <i>ndhC</i> | 0.000000             | 0.000000 | 0.000000 | <i>rpl22</i> | 0.249360             | 0.005990 | 0.008200 |
| <i>ndhD</i> | 0.362368             | 0.005420 | 0.004950 | <i>rpl23</i> | 0.000000             | 0.000000 | 0.000000 |
| <i>ndhE</i> | 0.000000             | 0.002600 | 0.002810 | <i>rpl32</i> | 0.000000             | 0.005410 | 0.005840 |
| <i>ndhF</i> | 0.466137             | 0.003260 | 0.003210 | <i>rpl33</i> | 0.144969             | 0.004350 | 0.005530 |
| <i>ndhG</i> | 0.169405             | 0.003480 | 0.003230 | <i>rpl36</i> | 0.000000             | 0.084950 | 0.223370 |
| <i>ndhH</i> | 0.302579             | 0.002720 | 0.002660 | <i>rpoA</i>  | 0.518453             | 0.002330 | 0.002900 |
| <i>ndhI</i> | 0.213336             | 0.002480 | 0.002270 | <i>rpoB</i>  | 0.332935             | 0.001760 | 0.002510 |
| <i>ndhJ</i> | 0.253986             | 0.002280 | 0.001800 | <i>rpoC1</i> | 0.278822             | 0.001260 | 0.002060 |
| <i>ndhK</i> | 0.067377             | 0.004210 | 0.003360 | <i>rpoC2</i> | 0.314354             | 0.002480 | 0.002870 |
| <i>pbfl</i> | 0.000000             | 0.004520 | 0.004340 | <i>rpS11</i> | 0.024313             | 0.002610 | 0.002060 |
| <i>petA</i> | 1.077751             | 0.002480 | 0.003260 | <i>rpS12</i> | 0.000000             | 0.000000 | 0.000000 |
| <i>petB</i> | 0.037075             | 0.001340 | 0.001760 | <i>rpS14</i> | 0.000000             | 0.003590 | 0.002830 |
| <i>petD</i> | 0.000000             | 0.001160 | 0.001090 | <i>rpS15</i> | 0.680318             | 0.002960 | 0.004190 |
| <i>petG</i> | 0.000000             | 0.000000 | 0.000000 | <i>rpS16</i> | 0.000000             | 0.003980 | 0.005180 |
| <i>petL</i> | 0.000000             | 0.001100 | 0.002980 | <i>rpS18</i> | 0.000000             | 0.002600 | 0.002810 |
| <i>petN</i> | 0.000000             | 0.001170 | 0.003180 | <i>rpS19</i> | 0.021620             | 0.004530 | 0.004030 |
| <i>psaA</i> | 0.093576             | 0.000890 | 0.001400 | <i>rpS2</i>  | 0.241627             | 0.001250 | 0.001210 |
| <i>psaB</i> | 0.163367             | 0.001540 | 0.001820 | <i>rpS3</i>  | 0.307191             | 0.002370 | 0.003470 |
| <i>psaC</i> | 0.000000             | 0.002810 | 0.002330 | <i>rpS4</i>  | 0.140003             | 0.002470 | 0.002830 |
| <i>psaI</i> | 0.000000             | 0.000000 | 0.000000 | <i>rpS7</i>  | 0.000000             | 0.000450 | 0.001220 |
| <i>psaJ</i> | 0.037774             | 0.006260 | 0.008870 | <i>rpS8</i>  | 0.078369             | 0.001990 | 0.002830 |
| <i>psbA</i> | 0.114451             | 0.002200 | 0.002160 | <i>ycf1</i>  | 0.584244905          | 0.004930 | 0.005980 |
| <i>psbB</i> | 0.000000             | 0.000660 | 0.000940 | <i>ycf15</i> | 0.000000             | 0.000000 | 0.000000 |
| <i>psbC</i> | 0.088545             | 0.001250 | 0.001560 | <i>ycf2</i>  | 0.420059             | 0.001010 | 0.001130 |
| <i>psbD</i> | 0.000000             | 0.001410 | 0.001620 | <i>ycf3</i>  | 0.257943             | 0.002150 | 0.001690 |
| <i>psbE</i> | 0.000000             | 0.001580 | 0.002270 | <i>ycf4</i>  | 0.216835             | 0.001260 | 0.001550 |
| <i>psbF</i> | 0.000000             | 0.000000 | 0.000000 |              |                      |          |          |

Note:  $\pi$ , nucleotide polymorphism;  $\theta$ , nucleotide polymorphism per site.
